# Supplementary material for: Perioperative Pain and Addiction Interdisciplinary Network (PAIN): protocol of a practice advisory for the perioperative management of buprenorphine using a modified Delphi process
Source: PubMed Central journal article supplement — BMJ Open. 2019 May 22;9(5):e027374. doi: 10.1136/bmjopen-2018-027374 (PMC6538090; doi:10.1136/bmjopen-2018-027374), 2019-05-22
Supplement: bmjopen-2018-027374.draft_revisions.pdf [file bmjopen-2018-027374.draft_revisions.pdf]

# BMJ Open

BMJ Open is committed to open peer review. As part of this commitment we make the peer review history of every article we publish publicly available.

When an article is published we post the peer reviewers' comments and the authors' responses online. We also post the versions of the paper that were used during peer review. These are the versions that the peer review comments apply to.

The versions of the paper that follow are the versions that were submitted during the peer review process. They are not the versions of record or the final published versions. They should not be cited or distributed as the published version of this manuscript.

BMJ Open is an open access journal and the full, final, typeset and author-corrected version of record of the manuscript is available on our site with no access controls, subscription charges or pay-per-view fees (<http://bmjopen.bmj.com>).

If you have any questions on BMJ Open's open peer review process please email [info.bmjopen@bmj.com](mailto:info.bmjopen@bmj.com)

# BMJ Open

## The Perioperative management of Buprenorphine: Protocol for a modified Delphi process

|                               |                                                                                                                                                                                                                                                                                                                                                                                                                                                                                                                                                                                                                                                                                                                                                                                                                                                                                                                                                                                                                                                                                                                                            |
|-------------------------------|--------------------------------------------------------------------------------------------------------------------------------------------------------------------------------------------------------------------------------------------------------------------------------------------------------------------------------------------------------------------------------------------------------------------------------------------------------------------------------------------------------------------------------------------------------------------------------------------------------------------------------------------------------------------------------------------------------------------------------------------------------------------------------------------------------------------------------------------------------------------------------------------------------------------------------------------------------------------------------------------------------------------------------------------------------------------------------------------------------------------------------------------|
| Journal:                      | <i>BMJ Open</i>                                                                                                                                                                                                                                                                                                                                                                                                                                                                                                                                                                                                                                                                                                                                                                                                                                                                                                                                                                                                                                                                                                                            |
| Manuscript ID                 | bmjopen-2018-027374                                                                                                                                                                                                                                                                                                                                                                                                                                                                                                                                                                                                                                                                                                                                                                                                                                                                                                                                                                                                                                                                                                                        |
| Article Type:                 | Protocol                                                                                                                                                                                                                                                                                                                                                                                                                                                                                                                                                                                                                                                                                                                                                                                                                                                                                                                                                                                                                                                                                                                                   |
| Date Submitted by the Author: | 19-Oct-2018                                                                                                                                                                                                                                                                                                                                                                                                                                                                                                                                                                                                                                                                                                                                                                                                                                                                                                                                                                                                                                                                                                                                |
| Complete List of Authors:     | Goel, Akash; Harvard University T H Chan School of Public Health, Department of Epidemiology; University of Toronto Department of Anesthesia, University of Toronto<br>Azargive, Saam; Queens University School of Medicine, Department of Anesthesiology and Perioperative Medicine<br>Weissman, J. S.; Harvard University T H Chan School of Public Health; Brigham and Women's Hospital, Center for Surgery and Public Health<br>Shanthanna, Harsha; McMaster, University St Joseph's Health Care, Department of Anesthesia<br>Ladha, Karim; University Health Network, Pain Research Unit; University of Toronto Department of Anesthesia, University of Toronto<br>Lamba, Wiplove; University of Toronto Department of Psychiatry<br>Duggan, Scott; Queens University School of Medicine, Department of Anesthesiology and Perioperative Medicine<br>Hanlon, John; University of Toronto Department of Anesthesia, University of Toronto<br>Di Renna, Tania; University of Toronto Department of Anesthesia, University of Toronto<br>Peng, PW; University of Toronto<br>Clarke, Hance; University Health Network, Pain Research Unit |
| Keywords:                     | Buprenorphine, SURGERY, Chronic Pain, Opioid Use Disorder, Perioperative Management                                                                                                                                                                                                                                                                                                                                                                                                                                                                                                                                                                                                                                                                                                                                                                                                                                                                                                                                                                                                                                                        |
|                               |                                                                                                                                                                                                                                                                                                                                                                                                                                                                                                                                                                                                                                                                                                                                                                                                                                                                                                                                                                                                                                                                                                                                            |

SCHOLARONE™  
Manuscripts

**Title:** The Perioperative management of Buprenorphine: Protocol for a modified Delphi process

### Author Information

Akash Goel M.D.<sup>1,2</sup> [agoel@hsph.harvard.edu](mailto:agoel@hsph.harvard.edu)  
Saam Azargive MSc<sup>3</sup> [sazargive@qmed.ca](mailto:sazargive@qmed.ca)  
Joel S. Weissman PhD<sup>2,4</sup> [jweissman@partners.org](mailto:jweissman@partners.org)  
Harsha Shanthanna M.D. MSc<sup>5</sup> [shanthh@mcmaster.ca](mailto:shanthh@mcmaster.ca)  
Karim Ladha M.D. MSc<sup>6</sup> [karim.ladha@uhn.ca](mailto:karim.ladha@uhn.ca)  
Wiplove Lamba M.D.<sup>7</sup> [lambaw@smh.ca](mailto:lambaw@smh.ca)  
Scott Duggan M.D.<sup>3</sup> [duggans@kgh.kari.net](mailto:duggans@kgh.kari.net)  
John Hanlon M.D. MSc<sup>1</sup> [hanlonj@smh.ca](mailto:hanlonj@smh.ca)  
Tania Di Renna M.D.<sup>1</sup> [tania.direнна@wchospital.ca](mailto:tania.direнна@wchospital.ca)  
Philip Peng M.D., PhD<sup>1</sup> [philip.peng@uhn.ca](mailto:philip.peng@uhn.ca)  
Hance Clarke<sup>10</sup> M.D., PhD<sup>6</sup> [hance.clarke@uhn.ca](mailto:hance.clarke@uhn.ca)

1: Department of Anesthesiology, University of Toronto  
2: T.H. Chan School of Public Health, Harvard University  
3: Department of Anesthesiology and Perioperative Medicine, Queens University School of Medicine  
4: Center for Surgery and Public Health, Brigham and Women's Hospital  
5: Department of Anesthesiology, McMaster University  
6: Pain Research Unit, Department of Anesthesia and Pain Management, Toronto General Hospital  
7: Department of Psychiatry, University of Toronto

### Corresponding Author

Hance Clarke, MD PhD: [hance.clarke@uhn.ca](mailto:hance.clarke@uhn.ca)  
Pain Research Unit  
Department of Anesthesia and Pain Management  
Toronto General Hospital  
Toronto, Ontario  
M5G 2C4  
Cell: +1416 457 4262

### Word Counts

Abstract: 286 words  
Body: 2646 words

### Funding Statement

Harsha Shanthanna is supported by the Canadian Anesthesia Research Foundation grant as a 'Career Investigator Award'.

Funding was provided by the Ontario Ministry of Health and Long Term Care

### Conflicts of Interest

None of the authors declared a conflict of interest

### Key Words

Buprenorphine, Surgery, Substance Use Disorder, Chronic Pain, Perioperative Management, Perioperative Guidelines

### The Perioperative management of Buprenorphine: Protocol for a modified Delphi process

Akash Goel, Saam Azargive, Joel Weissman, Harsha Shanthanna, Karim Ladha, Wiplove Lamba, Scott Duggan, John Hanlon, Tania Di Renna, Philip Peng, Hance Clarke

### Abstract

## Introduction

The ongoing opioid epidemic has necessitated increasing prescriptions of buprenorphine, which is intended to reduce opioid cravings and harms associated with unsafe opioid administration. A systematic review of perioperative management strategies for patients taking buprenorphine concluded that there was little guidance for managing buprenorphine perioperatively. The aim of this project is to develop consensus guidelines on the optimal perioperative management strategies for this group of patients. In this paper we present the design for a modified Delphi technique that will be used to gain consensus among patients and multidisciplinary experts in addiction, pain, community and perioperative medicine.

## Methods and Analysis

A national panel of experts was identified by perioperative, pain, and/or addiction systematic review authorship, established international profile in perioperative, pain and/or addiction research, community clinical excellence, and by peer referral. A steering group will develop a first round a list of indications to be rated by the panel of national experts, patients, and allied health care professionals. In round 1, the expert panel will rate the appropriateness of each individual item and provide additional suggestions for revisions, additions, or deletions. The definition for consensus will be set *a priori*. Consensus will be gauged for both appropriateness and inappropriateness of treatment strategies. Where agreement is not reached and items are suggested for addition/deletion/modification, round 2 will take place over teleconference in order to obtain consensus.

## Ethics and Dissemination

Ethics approval was not required by institutional IRB. We plan on developing a national guideline for the management of patients taking buprenorphine in the perioperative period that will be generalizable across 3 sets of pre-operative diagnoses including Opioid Use Disorder and/or Co-occurring Pain Disorders. The findings will be published in peer-reviewed publications and conference presentations.

## Article Summary (Strengths and Limitations)

1. Existing Perioperative Strategies to manage patients on buprenorphine are based on expert opinion and regional practices
2. We will employ a modified Delphi Protocol optimizing medical and geographical diversity of panellists to ensure the development of a trustworthy set of guidelines
3. We will aim to include patient and allied-health care experts on our panel to ensure that the Delphi process and guideline development is patient-centered
4. Agreement and Disagreement will be measured by apriori agreed upon consensus criteria
5. Given that new buprenorphine products are being released and diagnostic scales are being constantly re-evaluated, we will aim to re-visit our guidelines regularly

## Introduction

Buprenorphine has been used for opioid detoxification, addiction therapy, acute pain and chronic pain management since 2002 (1). Its unique pharmacological properties and wide safety profile have made it increasingly prescribed in the chronic pain and addiction patient population. The number of patients on buprenorphine treatment is increasing (2,3). Since its approval in 2002, the number of buprenorphine/naloxone tablets sold increased from 8 million in 2005 to over 145 million in 2009. Emerging studies have shown that increasing Medicaid coverage for Buprenorphine-naloxone has resulted in an overall increase in people filing prescriptions for buprenorphine-naloxone (4).

Until now, inadequate pain management is the main impetus for the perioperative discontinuation of buprenorphine. Emerging opinions suggest that its perioperative discontinuation may hinder harm

1  
2  
3 reduction by destabilizing patients with opioid use disorder. For example, transitioning a patient off  
4 buprenorphine to a full agonist opioid will permit free access to opioid receptors for the purposes of  
5 analgesia, but will not address the substance use disorder that may worsen as a result (5). Emerging  
6 evidence suggests that certain subsets of patients are less likely to experience deterioration of their  
7 substance use disorder (5,6) no matter which strategy is pursued (continue or discontinue).

8  
9 Currently, the quality of evidence regarding perioperative management of patients on buprenorphine is  
10 weak. A systematic review conducted by Goel et al (In press) revealed that the number of studies to address  
11 the perioperative dilemma is limited, and few directly evaluated the question of continuation versus  
12 discontinuation of buprenorphine (7-23). Few studies make considerations for the possibility of relapse in  
13 cases where there has been a history of Opioid Use Disorder (OUD). Many studies highlighted the  
14 importance of multimodal and regional anesthesia techniques. Furthermore, the only RCT combined  
15 patients taking buprenorphine and methadone into one group (24), limiting the study's applicability to the  
16 important question: Should buprenorphine be continued in the perioperative period or not?

17  
18 There is a need to develop specific guidance on how to manage OUD perioperatively. Until now, 8 major  
19 guidelines (1, 25-31) were built on the backbone of anesthesiologists' opinions and existing case reports (7-  
20 23) (Table 1, Appendix 1). Many of the existing guidelines propose discontinuation of buprenorphine  
21 before surgery, especially where high-pain is expected. However, more recently, editorialized guidelines  
22 have proposed continuation of buprenorphine depending on the pre-operative dose and indication (31).  
23 Moreover, there is disagreement on the best discharge strategies for patients taking buprenorphine,  
24 irrespective of diagnosis. While most guidelines agree upon major principles such as multimodal analgesia,  
25 there is no consensus on which strategies are more likely to succeed. Overall, there is disagreement on  
26 optimal pre-, intra-, and post-operative strategies for managing buprenorphine in patients with OUD and/or  
27 chronic pain disorders.

28  
29 Given the lack of RCTs, the strength of a Delphi process is to bring geographically and medically diverse  
30 experts together and determine where there is agreement in the perioperative management of  
31 buprenorphine. Furthermore, this process ensures the integration of multidisciplinary and patient opinions,  
32 resulting in more patient-centered and trustworthy guidelines.

### 33 **Aim**

34 We will aim to use a national expert consensus Delphi-based survey technique to develop and evaluate a set  
35 of recommendations that address perioperative buprenorphine management strategies. We will seek to  
36 focus on the following factors: 1) Indication for Buprenorphine therapy, 2) Risk of worsening of substance  
37 use disorder and/or co-occurring pain disorder, 3) Expected pain after surgery, 4) Feasibility of  
38 perioperative regional anesthesia technique, 5) Utility of adjunct analgesia and 6) Dose and formulation of  
39 buprenorphine therapy. We will follow the 22-step checklist recommended by the RIGHT group (36) for  
40 the EQUATOR network.

### 41 **Methods and Design**

42 This study will use a modified Delphi technique, which was developed by the RAND corporation (32) in  
43 order to address complex problems that cannot be solved without a group of experts. The Delphi technique  
44 involves anonymous voting and controlled feedback in order to generate discussion and eventual consensus  
45 on controversial topics. The Delphi method reduces the likelihood of situations in which group consensus is  
46 dominated by the perspectives of a strong minority (33).

47  
48 An International Research Steering Committee has developed the list of indications, and we plan to conduct  
49 2 Delphi rounds in which experts rate appropriateness of buprenorphine management. Panel responses will  
50 be de-identified, compiled, analyzed and summarized before being returned to panelists. The summary  
51 report will entail qualitative and quantitative details about individual panelists' responses compared to their  
52 counterparts. It is expected that the panelist can then review their responses in light of the replies of other  
53 panelists prior to a round 2 in-person discussion and re-rating.

### 54 **Steering Committee**

1  
2  
3 An International Steering Committee (Harvard University, University of Toronto, McMaster University,  
4 Queen's University) was formed to develop and conduct this project and consists of representation from  
5 various disciplines (Anaesthesiology, Family Practice, Epidemiology, Addictions Medicine, Pain  
6 Medicine), geographical areas (Canada, United States) and research expertise (Delphi, health services, and  
7 quantitative methods). A literature review including a systematic review was conducted by the steering  
8 committee to understand the scope of management strategies published to date. The protocol and associated  
9 methods were established and agreed upon through in-person, telephone, and email communication.  
10 Important functional domains of the research question were considered by the steering committee after  
11 completion of the literature review (i.e. Pre-Operative Management, Post-operative buprenorphine  
12 management, inpatient use of opioids and adjuncts for analgesia, involvement of outpatient providers, and  
13 discharge planning). These domains are represented as 'sections' in the final questionnaire. Reference was  
14 made to previous and published Delphi studies (33,34). There were 3 drafts reviewed by the Steering  
15 committee, and a final draft after a self-test by the steering committee provided a further set of comments  
16 and suggestions.

### 17 **Generation of the Chapters with Indications (Items)**

18 The indications and domains identified from the systematic review (35) were examined along with the  
19 available evidence from existing recommendations on this topic (1, 25-31). Furthermore, case experience  
20 from addiction and pain physicians was used to complete a panel rater-form based on the RAND  
21 questionnaires used in existing studies (32). The form was generated in order to reflect the essential  
22 processes involved in the perioperative experience of patients maintained on Buprenorphine. In total, 840  
23 indications will be divided into 3 chapters of pre-operative diagnoses. – 1. Opioid Use Disorder Only, 2.  
24 Opioid Use Disorder with Co-occurring Pain Disorder, 3. Pain Disorder Only. Panellists will indicate their  
25 preference for various perioperative strategies (continue, reduce, stop) by systematically rating these  
26 indications from chapters 1 to 3.

### 27 **Selection of National Panel of Experts (Participants and Recruitment)**

28  
29 'Experts' were defined as individuals involved in the management, development, research, teaching or  
30 analysis of clinical perioperative buprenorphine strategies. Because the Delphi group size depends more on  
31 optimizing group dynamics to obtain consensus than statistical analysis, we aimed for a panel size based on  
32 original Delphi methodology from the RAND study (32) (optimal panel size of 9 and no greater than 15).  
33 We set an a priori estimate of panellist attrition rate (20%) and aimed to select up to 15 panellists for Round  
34 1 (the maximum recommended by the RAND authors).

35  
36 To identify experts in the field of addiction and perioperative medicine, we reviewed authorship of  
37 published guidelines and case reports of buprenorphine management in the perioperative period; we  
38 identified established national and regional profiles in addiction, pain, or perioperative medicine; we  
39 solicited peer recommendations from individuals on boards of the National Canadian Pain, Addiction, and  
40 Anaesthesiology Societies (CSAM, CPS, CAS). In order to optimize the face validity of our panel, we  
41 sought to include allied healthcare professionals and patients as well. Inclusion of a nurse practitioner and  
42 patient allowed the panellists to consider the values and preferences of the target population. We sought to  
43 diversify our panel by selecting panellists with practice experience in all the Canadian provinces,  
44 membership on professional societies, and wide-ranging expertise.

45  
46 We initially reached out to these prospective expert panellists by emailing solicitation letters describing the  
47 project and the timelines involved (Appendix 2). Prospective panellists were then asked to complete and  
48 return a conflict of interest form (Appendix 3) along with their indication of interest in the project.  
49 Conflicts of Interest were reviewed by the Steering Committee and prospective panellists with potential  
50 conflicting industry affiliations were removed from the final shortlist. Possible incentives for participation  
51 in this process included (1) the opportunity to be selected into a diverse group (2) unique educational  
52 opportunities and (3) increased internal and external visibility (1).

### 53 **Ethics**

54 All participants will be informed that by responding to the questionnaire, they have indicated their consent  
55 to participate in the study and have their de-identified responses included in associated analyses. All data  
56  
57  
58  
59

1  
2  
3 will be preserved on paper (under lock and key) as well as a computer (which is password protected) in a  
4 locked office, in accordance with standard guidelines. Only the steering committee will have access to the  
5 data, which will be destroyed after 5 years in accordance with local guidelines.  
6

### 7 **Delphi Procedures (Data Collection and Data Analysis)**

8  
9 We will administer paper questionnaires that will be delivered as attachments to expert panellists by email.  
10 Panellists will be asked to print out the questionnaires and complete them on paper. The email will include  
11 an instruction form (Appendix 4) that includes a table of contents and a sample exercise grid. Furthermore,  
12 a systematic review completed by the steering committee will be provided to panellists as a resource for  
13 supplement existing knowledge and experience in this topic. To reduce the likelihood of attrition bias, we  
14 will notify the panel that authorship of the final guideline document will be offered only to participants that  
15 complete the entire Delphi process.  
16

### 17 **Round 1 & 2 of Delphi Procedure**

18 The Delphi process will consist of 2 survey rounds. The first round will consist of questionnaires that will  
19 be completed remotely by all panellists. Panellists will be blinded to each other's participation in the first  
20 round to prevent any communication that may lead to bias in the ratings. The first survey round will extend  
21 to 3 weeks, with the first week dedicated to addressing any concerns raised by panellists. In this round,  
22 panellists will first be asked to rate the appropriateness of continuing or stopping buprenorphine where: 1 =  
23 Very Appropriate to Stop Buprenorphine and 9 = Very Appropriate to Continue Buprenorphine at the same  
24 or reduced dose. Next, panelists will be asked to rate the appropriateness of reducing vs maintaining  
25 dosage, where: 1 = Very Appropriate to reduce Buprenorphine dosage; and 9 = Very Appropriate to  
26 Continue Buprenorphine at the same dosage. Panellists will also be asked to identify potential deletions,  
27 modifications, or points of clarification upon return of the rating forms. Panellists will then scan and return  
28 their rating forms with unique personal identifier codes on each page.

29 In order to identify thresholds for agreement, we will include pre-determined information about  
30 buprenorphine dose, formulation, diagnosis (Pain and/or OUD), risk of exacerbation of underlying  
31 disorder, expected surgical pain, and availability of regional anaesthetic technique in the final list of  
32 indications. These 840 indications will reflect the complete perioperative period, including strategies for  
33 communication with the outpatient provider and utilization of multimodal analgesia.  
34

35 After completion of round 1, a 2-week Analysis Period will ensue, in which two blinded independent  
36 analysts will extract de identified data from rating forms and input data into two mutually exclusive  
37 databases. De-identified results including scores for each indication (including median and mode scores,  
38 interquartile ranges, indications with universal consensus, and qualitative feedback) along with a narrative  
39 report of the findings will be remitted to individual panellists to review prior to round 2 of the Delphi  
40 Process. The second-round meeting will be conducted in person and over teleconference given the  
41 geographic diversity of expert panellists. Any ambiguous indications, or external factors not previously  
42 considered will be aggregated for discussion during this round. Panellists will have the opportunity to  
43 discuss addition or removal of indications (items) at this point. If indications are deemed to be insufficient  
44 (not capturing the breadth of the theme) or overly inclusive (extreme granularity of indications) then the  
45 steering committee will offer a second round of rating after inclusion or exclusion of culprit items. If  
46 duplicate indications exist, where possible, the steering committee will aim to combine indications.  
47

### 48 **Definition of Consensus**

49 In any Delphi process, decision rules are determined in advance to both define and determine consensus.  
50 Consensus on a topic is usually determined if a certain number or percentage of the votes falls within a  
51 prescribed range. The Steering Committee has *a priori* decided on its definition of consensus in order to  
52 avoid bias. Using the European Union BIOMED Concerted Action on Appropriateness for surgical  
53 procedures as referenced in the RAND/UCLA Appropriateness Method User's Manual (32).  
54

55 We define consensus (agreement) in 2 ways: 1) Appropriate treatment defined as a clustering of scores with  
56 a median score in the high end of the scale (7-9) without 'disagreement' (i.e. more than 2 panellists' scores  
57  
58  
59  
60

1  
2  
3 in the low end of the scale, 1-3) and 2) Inappropriate treatment defined as a clustering of scores with a  
4 median score in the low end of the scale (1-3) without 'disagreement' (i.e. more than 2 panellists' scores in  
5 the high end of the scale, 7-9).

### 7 **Development of Guidelines and Recommendations**

8 A final operational manual with decision rules for each indication will be presented to panellists during the  
9 second-round meeting, with accompanying explanatory documents as necessary. Panellists will be asked to  
10 rank and order the recommendations to rationalize the number of items included in the final guideline as  
11 per the EQUATOR network's reporting tool for practice guidelines in healthcare (RIGHT) (36). An email  
12 questionnaire will aim to obtain a final majority agreement on the synthesis of comments after the 2<sup>nd</sup> round  
13 of the Delphi process. It is expected that clear and concise rationale will accompany individual  
14 recommendation statements.

### 15 **Review and Quality Assurance**

16 We plan to use a 2-step process in order to develop and refine an internationally agreed upon guideline for  
17 the perioperative management of patients maintained on buprenorphine. Initially, a draft guideline will  
18 undergo independent review by members external to the steering committee. Any comments will be  
19 addressed explicitly in the final guideline document. A questionnaire will be emailed out to panellists after  
20 the second round to solicit suggestions for improvement in future iterations.

21  
22 The guideline document should reflect the needs of patients who have co-occurring disorders where  
23 possible, therefore facilitating its use in as many perioperative scenarios as possible. The final consensus  
24 guidelines will be submitted to a perioperative journal and championed by individual panellists at their  
25 home institutions.

26  
27 To test the acceptability of the proposed guidelines due to varying geography and practice patterns, we will  
28 seek annual comments and suggestions from regional and national users of the guideline. The guideline  
29 document should be reviewed annually in order to reflect shifting evidence and expert opinion.

### 30 **Funding and management of interests**

31 No funding sources will be used in any stage of the guideline development. Individual steering committee  
32 members and panellists were made to complete conflict of interest forms prior to involvement in this  
33 process. Any prospective steering committee members or panellists with perceived conflicts of interests  
34 were not included at any point of the guideline development. Original declaration forms outlining conflict  
35 of interest are available upon request to the first author of the study (Akash Goel).

### 36 **Limitations of the Guideline**

37 Increasingly, providers are beginning to see off-label prescription of sublingual buprenorphine for patients  
38 with pain disorders. Furthermore, there are several new formulations of buprenorphine emerging. As  
39 evidence emerges and new formulations of buprenorphine are developed, these guidelines will require  
40 updating in the future hopefully on an annual basis.

### 41 **Delphi Study Status**

42 The first round of the Delphi process will begin in October, with an in-person, second round meeting  
43 scheduled in November 2018. Data collection and analysis will occur after the second-round meeting if  
44 panellists and the steering committee are satisfied that all important questions have been addressed. A  
45 paper reporting the results of the Delphi process will be submitted for publication in early 2019 followed by  
46 conference presentations. Data collection will start in October 2018 and anticipated to be completed by  
47 December 2018.

### 48 **Author Statement**

49 Akash Goel, Joel Weissman and Harsha Shanthanna developed the Delphi Protocol and methodology

50 Akash Goel and Saam Azargive developed and modified Round 1 panel rating forms



1  
2  
3  
4  
5  
6  
7  
8  
9  
10  
11  
12  
13  
14  
15  
16  
17  
18  
19  
20  
21  
22  
23  
24  
25  
26  
27  
28  
29  
30  
31  
32  
33  
34  
35  
36  
37  
38  
39  
40  
41  
42  
43  
44  
45  
46  
47  
48  
49  
50  
51  
52  
53  
54  
55  
56  
57  
58  
59  
60

Akash Goel, Karim Ladha, Wiplove Lamba, Scott Duggan, John Hanlon, Tania Di Renna, Philip Peng and Hance Clarke were involved in the development of the research question and formulation of the Delphi Protocol as part of the Steering Committee

For peer review only

## References

1. Anderson TA, Quaye A, Ward E, Wilens T, Hilliard P, Brummet C: To Stop or Not, That Is the Question: Acute Pain Management for the Patient on Chronic Buprenorphine. *Anesthesiology* 2017; 126(6): 1180-6
2. Potter, J.S.; Dreifuss, J.A.; Marino E.N. et al. The multisite prescription opioid addiction treatment study: 18-month outcomes. *Journal of Substance Abuse Treatment* (48)1:62-69, 2015.
3. Weiss, R.D.; Potter, J.S.; Griffin, M.L. et al. Long-term outcomes from the National Drug Abuse Treatment Clinical Trials Network Prescription Opioid Addiction Treatment
4. Saloner B, Levin J, Chang H, Jones C, Alexander GC. Changes in Buprenorphine-Naloxone and Opioid Pain Reliever Prescriptions After the Affordable Care Act Medicaid Expansion. *JAMA Network Open*. 2018;1(4):e181588. doi:10.1001/jamanetworkopen.2018.1588
5. Adams E, Sharifi N, Lappalainen L: A Guideline for the clinical management of opioid use disorder; British Columbia Centre on Substance Use; 18-19. Available from at: <http://www.bccsu.ca/care-guidance-publications> - Last Accessed December 4, 2017
6. Cornish R, Macleod J, Strang J, Vickerman P, Hickman M: Risk of death during and after opiate substitution treatment in primary care: prospective observational study in UK General Practice Research Database; *BMJ* 2010; 341:c5475
7. Huang A, Katznelson R, de Perrot M, Clarke H: Perioperative Management of a patient undergoing Clagett window closure stabilized on Suboxone for chronic pain: a case report. *Can J Anesthesia* 2014; 61: 826-31
8. Book S, Myrick H, Malcolm R: Buprenorphine for postoperative pain following general surgery in a buprenorphine-maintained patient. *Am J Psychiatry* 2007; 164(6): 979
9. Silva J, Rubinstein A: Continuous Perioperative Sublingual Buprenorphine. *Journal of Pain and Palliative Care Pharmacology* 2016; 30(4): 289-93
10. Chern S, Isserman R, Chen L, Ashburn M, Liu R: Perioperative Pain Management for Patients on Chronic Buprenorphine: A Case Report. *J Anesth Clin Res* 2013; 3(250)
11. Israel J, Poore S: The clinical conundrum of perioperative pain management in patients with opioid dependence: lessons from two cases. *Plast Reconstr Surg* 2013; 131(4): 657
12. Jones, H, Johnson R, Milio L: Post-cesarean pain management of patients maintained on methadone or buprenorphine. *Am J Addict* 2006; 15(3): 258-9
13. Marcucci C, Fudin J, Thomas P, Sandson N, Welsh C: A new pattern of buprenorphine misuse may complicate perioperative pain control. *Anesth Analg* 2009; 108(6): 1996-7
14. Khelemsky Y, Schauer J, Loo N: Effect of buprenorphine on total intravenous anesthetic requirements during spine surgery. *Pain Physician* 2015; 18:261-4
15. McCormick Z, Chu S, Chang-Chien G, Joseph P: Acute pain control challenges with buprenorphine/naloxone therapy in a patient with compartment syndrome secondary to McArdle's Disease: A case report and review. *Pain Physician* 2013; 14: 1187-91
16. Rodgman C, Pletsch, G: Double successful buprenorphine/naloxone induction to facilitate cardiac transplantation in an iatrogenically opiate-dependent patient. *Journal of Addiction Medicine* 2012;

- 6(2): 177-8
17. Kornfeld H, Manfredi L: Effectiveness of full agonist opioids in patients stabilized on buprenorphine undergoing major surgery: A case series. *American Journal of Therapeutics* 2010; 17: 523-28
  18. Hassamal S, Goldenberg M, Ishak W, Haglund M, Miotto K, Danovitch I. Overcoming barriers to initiating medication-assisted treatment for heroin use disorder in a general medical hospital: A case report and narrative literature review. *Journal of Psychiatric Practice* 2017; 23(3): 221-9
  19. Brummett C, Trivedi K, Dubovoy A, Berland D: Dexmedetomidine as a novel therapeutic for postoperative pain in a patient treated with buprenorphine. *Journal of Opioid management* 2009; 5(3): 175-9
  20. Gupta D, Christensen C, Soskin V: Marked variability in peri-partum anesthetic management of patients on buprenorphine maintenance therapy (BMT): Can there be an underlying acute opioid induced hyperalgesia precipitated by neuraxial opioids in BMT patients? *Middle East J Anaesthesiology* 2013; 22(3): 273-81
  21. Macintyre P, Russel R, Usher K, Gaughwin M, Huxtable C: Pain relief and opioid requirements in the first 24 hours after surgery in patients taking buprenorphine and methadone opioid substitution therapy. *Anaesth Intensive Care* 2013; 41:222-30
  22. Meyer M, Paranya G, Norris A, & Howard D: Intrapartum and postpartum analgesia for women maintained on buprenorphine during pregnancy. *European Journal of Pain* 2010; 14(9): 939-43
  23. Hansen L, Stone G, Matson C, Tybor D, Pevear M, Smith E: Total Joint Arthroplasty in Patients Taking Methadone or Buprenorphine/Naloxone Preoperatively for Prior Heroin Addiction: A Prospective Matched Cohort Study. *J Arthroplasty* 2016; 31(8):1698-701.
  24. Hoflich A, Langer M, Jagsch R, Bawert A, Winklbaaur B, Fischer G, Unger A: Peripartum pain management in opioid dependent women. *Eur J Pain* 2012; 16(4):574-84
  25. Childers JW, Arnold RM. Treatment of pain in patients taking buprenorphine for opioid addiction #221. *J Palliat Med* 2012; 15:613-614
  26. Bryson EO. The perioperative management of patients maintained on medications used to manage opioid addiction. *Curr Opin Anaesthesiol* 2014; 27:359-364
  27. Berry P, Besio S, Brooklyn J, Cimaglio B, Clark R, Davis W, et al.: Vermont Practice Guidelines 2015; Vermont Department of health; division of alcohol and drug abuse programs; office of Vermont health access; 1-30. Available from: [http://contentmanager.med.uvm.edu/docs/default-source/vchip-documents/vchip\\_2buprenorphine\\_guidelines.pdf?sfvrsn=2](http://contentmanager.med.uvm.edu/docs/default-source/vchip-documents/vchip_2buprenorphine_guidelines.pdf?sfvrsn=2) (accessed September, 2018).
  28. Sen S, Arulkumar S, Cornett E, Gayle J, Flower R, Fox C, Kaye A: New Pain Management Options for the Surgical patient on Methadone and Buprenorphine. *Curr Pain Headache Rep* 2016; 20:16
  29. Brummet C. Management of sublingual buprenorphine in the acute postoperative setting. The University of Michigan Health System 2008. Available from: [http://anes.med.umich.edu/vault/1003149Buprenorphine\\_suboxone\\_subutex\\_perioperative\\_management.pdf](http://anes.med.umich.edu/vault/1003149Buprenorphine_suboxone_subutex_perioperative_management.pdf). (Accessed August 2015)
  30. Jonan AB, Kaye AD, Urman RD. Buprenorphine Formulations: Clinical Best Practice Strategies Recommendations for Perioperative Management of Patients Undergoing Surgical or Interventional Pain Procedures. *Pain Physician* 2018; 21:E1-E12
  31. Lembke A, Ottestad E, Schmiesing C. Patients Maintained on Buprenorphine for Opioid Use Disorder

- 1  
2  
3 Should Continue Buprenorphine Through the Perioperative Period. *Pain Medicine*. 2018
- 4 32. Fitch, K., Bernstein, S. J., Aguilar, M. D., Burnand, B., LaCalle, J. R., Lázaro, P., . . . Kahan, J. P.  
5 (2001). (). *The RAND/UCLA Appropriateness Method User's Manual* Santa Monica, CA: Rand  
6 Health.
- 7 33. Slade SC, Dionne CE, Underwood M, *et al*. Standardised method for reporting exercise programmes:  
8 protocol for a modified Delphi study *BMJ Open* 2014;4:e006682. doi: 10.1136/bmjopen-2014-006682
- 9 34. Okoli C, Pawlowski SD. The Delphi method as a research tool: an example, design considerations and  
10 applications. *Inform Manag* 2004;42:15–29. doi:10.1016/j.im.2003.11.002
- 11 35. Goel A, Azargive S, Hanlon J, Ladha K, *et al* The Perioperative Patient on Buprenorphine: A  
12 Systematic Review of perioperative management strategies and patient outcomes. In Press, *Canadian*  
13 *Journal of Anesthesia* 2018
- 14 36. Chen Y, Yang K, Marusic Q, Qaseem A, Meerpohl JJ, Flottorp S, Aki EA, Schunemann HJ, Chan  
15 ESY, Falck-Ytter Y, Ahmed F, Barber S, Chen C, Zhang M, Xu B, Tian J, Song F, Shang H, Tang K,  
16 Wang Q, Norris SL. A reporting Tool for the practice guidelines in healthcare: The RIGHT statement.  
17 *Ann Internal Med*. 2017;166(2): 128-132
- 18  
19  
20  
21  
22  
23  
24  
25  
26  
27  
28  
29  
30  
31  
32  
33  
34  
35  
36  
37  
38  
39  
40  
41  
42  
43  
44  
45  
46  
47  
48  
49  
50  
51  
52  
53  
54  
55  
56  
57  
58  
59  
60

**Table 1.** Summary of major existing guidelines for perioperative management of buprenorphine

| Title                                           | Date | Major Peri-operative recommendations                                                                                                                                                                                                                                                                                                                                                                                                                                                                                                                                                                                                                                                                                                                                                                                                                              |
|-------------------------------------------------|------|-------------------------------------------------------------------------------------------------------------------------------------------------------------------------------------------------------------------------------------------------------------------------------------------------------------------------------------------------------------------------------------------------------------------------------------------------------------------------------------------------------------------------------------------------------------------------------------------------------------------------------------------------------------------------------------------------------------------------------------------------------------------------------------------------------------------------------------------------------------------|
| Brummett et al<br>(Michigan Guidelines)<br>(29) | 2007 | <ol style="list-style-type: none"> <li>1. Where moderate to severe pain is expected, cancel surgery in patients still taking buprenorphine, return the patient to the buprenorphine provider, and transition them to short-acting opioids for &gt;5 days prior to surgery</li> <li>2. Coordinate follow-up postoperatively with buprenorphine provider</li> <li>3. Anticipate the patient's course will be similar to an opioid tolerant patient</li> <li>4. Consider adjuncts – Acetaminophen and/or NSAIDs</li> <li>5. In cases where minimal to no pain is expected, continue buprenorphine for post operative pain</li> </ol>                                                                                                                                                                                                                                 |
| Anderson et al<br>(1)                           | 2017 | <ol style="list-style-type: none"> <li>1. Where moderate to severe pain is expected, cancel surgery such that buprenorphine is weaned off before surgery and short-acting opioids are used to replace it.</li> <li>2. A plan for follow-up and reinstatement of therapy should be established</li> <li>3. Anticipate patient's opioids requirements will be similar to an opioid-tolerant patient</li> <li>4. Consider adjuncts – NSAIDs, membrane stabilizers, acetaminophen, local anaesthetics, regional anesthetic techniques</li> <li>5. Ensure appropriate outpatient follow-up with buprenorphine provider</li> </ol>                                                                                                                                                                                                                                      |
| Sen et al<br>(28)                               | 2016 | <ol style="list-style-type: none"> <li>1. Discontinue buprenorphine 72H before operative procedure, or replace buprenorphine with methadone</li> <li>2. Expect additional opioid doses for acute pain control</li> <li>3. Discharge on pure opioid induction protocol of buprenorphine in conjunction with primary provider</li> </ol>                                                                                                                                                                                                                                                                                                                                                                                                                                                                                                                            |
| Jonan et al<br>(30)                             | 2018 | <ol style="list-style-type: none"> <li>1. Utilize non-opioid adjuncts, regional Anesthesia, and local anesthetic infiltration by surgeon where possible.</li> <li>2. Where low post operative pain is expected, continue buprenorphine perioperatively without taper</li> <li>3. Where intermediate pain is expected, discontinue buprenorphine 3 days prior to procedure, consider high dose PCA, and consider ICU admission for respiratory monitoring</li> <li>4. Where High pain is expected, discontinue buprenorphine 3-5 days prior to procedure, consider pure opioid agonist to manage withdrawal, and consider ICU for respiratory monitoring</li> </ol>                                                                                                                                                                                                |
| Childers and Arnold<br>(25)                     | 2012 | <ol style="list-style-type: none"> <li>1. Adjuvant analgesics and interventional procedures should be provided if available</li> <li>2. Hold buprenorphine and start short acting opioid agonists if expecting moderate to severe pain</li> <li>3. Re-initiate buprenorphine in the post-operative period with the buprenorphine provider</li> <li>4. Where mild to moderate pain is expected, consider treating pain with buprenorphine alone, or use short-acting opioid agonists at higher doses</li> <li>5. Consider replacing buprenorphine with methadone for opioid addiction where ongoing pain management is expected</li> </ol>                                                                                                                                                                                                                         |
| Bryson<br>(26)                                  | 2014 | <ol style="list-style-type: none"> <li>1. Ideally, buprenorphine should be discontinued 72H before surgery, then restarted once patient no longer has acute pain requiring narcotic analgesics</li> <li>2. If the plan is to continue buprenorphine, use short-acting opioid analgesics to achieve pain control, expecting higher than normal effective doses. Divide buprenorphine maintenance dose and administer every 6-8 hours</li> <li>3. If the plan is to stop the buprenorphine, use standard opioids for analgesia, conduct a slow taper over 2 weeks or an abrupt taper over 3 days, remaining buprenorphine free for 72 hours before surgery</li> <li>4. If the relapse rate is too high, replace maintenance dose of buprenorphine with methadone before surgery, and use another short-acting opioid and analgesic for breakthrough pain</li> </ol> |
| Berry et al.<br>(Vermont Guidelines)<br>(27)    | 2015 | <ol style="list-style-type: none"> <li>1. Reduce buprenorphine dose to 8mg SL on the day of surgery</li> <li>2. Use oxycodone or other full agonists to make up opiate debt + typical post operative course management</li> <li>3. Expect longer than normal pain management regimen in the post operative period</li> <li>4. Buprenorphine doses above 10mg daily will block opioid analgesics for pain</li> </ol>                                                                                                                                                                                                                                                                                                                                                                                                                                               |
| Lembke et al.<br>(Editorial)<br>(31)            | 2018 | <ol style="list-style-type: none"> <li>1. Continue buprenorphine in the perioperative period for patients taking 12mg SL or less</li> <li>2. Taper buprenorphine to 12 mg SL 2-3 days pre-op</li> <li>3. Multimodal analgesia, Regional techniques where possible</li> <li>4. Higher than normal doses of opioids to treat pain for 2-4 days post-op</li> </ol>                                                                                                                                                                                                                                                                                                                                                                                                                                                                                                   |

1  
2  
3  
4  
5  
6  
7  
8  
9  
10  
11  
12  
13  
14  
15  
16  
17  
18  
19  
20  
21  
22  
23  
24  
25  
26  
27  
28  
29  
30  
31  
32  
33  
34  
35  
36  
37  
38  
39  
40  
41  
42  
43  
44  
45  
46  
47  
48  
49  
50  
51  
52  
53  
54  
55  
56  
57  
58  
59  
60

For peer review only

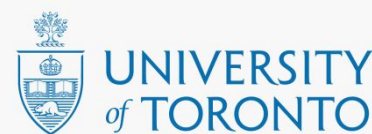

Dear Prospective Panelist,

We are writing to you to because you have been nominated for a special expert consensus panel. This Panel will be establishing guidelines on the perioperative management of patients who are taking buprenorphine for the management of pain and/or substance use disorder.

We will be embarking on this project because current evidence provides little guidance as to how best to manage this group of patients. Our group has conducted a systematic review of the existing evidence and we hope to use this for the basis of conducting a 2-staged Delphi process resulting in consensus on appropriateness of continuing or stopping buprenorphine in the perioperative period.

This process involves the following steps and timeline:

| Task                                                                                                                                     | Timeline                      |
|------------------------------------------------------------------------------------------------------------------------------------------|-------------------------------|
| Review of existing literature (Complete)                                                                                                 | Complete                      |
| <b>Nomination of experts in Addiction medicine, pain medicine, and Anesthesiology</b><br>Obtain CVs, Conflict of Interest Forms (Delphi) | By September                  |
| <b>Confirmation of Panel by Core Committee</b><br><b>Dissemination of Core Materials to Expert Panel</b>                                 | By September 15               |
| Review of evidence by expert panel (remotely done)                                                                                       | By September 31 <sup>st</sup> |
| Review of consensus statements (remotely done)                                                                                           | By September 31 <sup>st</sup> |
| Submission of consensus statements, and collation of data                                                                                | By September 31 <sup>st</sup> |
| Meeting by Teleconference/In-person to review consensus and/or conflicts                                                                 | By October 31st               |
| Development of consensus                                                                                                                 | By December 30th              |
| Publication of consensus document                                                                                                        | By January 2019               |

As part of the nomination process, we are seeking recognized experts as part of the Canadian Society of Addiction Medicine (CSAM), CPS (Canadian Pain Society) and CAS (Canadian Anesthesiologists' Society). You were nominated based on the following 4 criteria:

|                                  |
|----------------------------------|
| Leadership in the specialty      |
| Absence of conflicts of interest |
| Geographic diversity             |
| Diversity of practice setting    |

We would be delighted to have you serve on this panel, and would be happy to answer any questions you may have about the process. Please return your CVs and COI forms to me by August 4 if you are interested in pursuing this opportunity.

Sincerely,

The Steering Committee

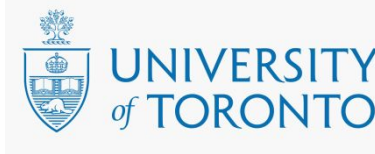

# CANADIAN BUPRENORPHINE CONSENSUS GUIDELINES

## CONFLICT OF INTEREST DISCLOSURE FORM

**The following are examples of conflicts of interest:**

- Any direct financial interest in a for-profit entity such as a pharmaceutical organization, medical devices company, communications firm, or other financial supporter
- Current or recent participation in a clinical trial sponsored by the Organization
- Membership with a speakers bureau
- Holding of a patent for a product referred to in the CPD activity or marketed by a commercial organization
- Receiving honoraria to speak on behalf of a pharmaceutical organization or medical communication company, including talks for which the individual has been contracted but has not yet received payment for
- Financial relationships with program-sponsoring organizations that are non-pharmaceutical or non-health care organizations (eg, insurance companies, financial institutions, government, for-profit organizations, other non-profit organizations)

I, \_\_\_\_\_ declare no conflict of interest

I, \_\_\_\_\_ declare the following conflicts of interest  
(Please list below)

Signature \_\_\_\_\_ -

Name \_\_\_\_\_

Title \_\_\_\_\_



**PERIOPEARTIVE BUPRENORPHINE MANAGEMENT – PRIVATE AND CONFIDENTIAL – PLEASE DO NOT SHARE**Perioperative Management of Buprenorphine Products**Panel Instructions**

Dear Panellist,

Thank you for your participation in the national guideline development for managing patients taking buprenorphine products in the perioperative period. Below you will find some definitions and instructions for how to fill out the panel rating forms.

There are 840 indications that you will be required to rate.

**How does the Modified Delphi process work?**

There are 2 rounds of ratings – the first round is done in a ‘blinded’ fashion where panellists are not aware of who the other panellists are, and are not meant to discuss their thoughts with each other. They are to fill out rater forms and return them to the **moderator**. There will be a second round where panellists will meet in person and teleconference to discuss discrepancies in their rating and aim to obtain consensus on conflicting areas.

**How are the rating forms organized?**

There are 3 **chapters** that are focused on the diagnosis of the patient prior to surgery

1. *OPIOID USE DISORDER ONLY (No co-occurring pain disorder) – 280 indications*
2. *OPIOID USE DISORDER AND PAIN DISORDER – 280 indications*
3. *PAIN DISORDER ONLY (No co-occurring opioid use disorder) – 280 indications*

These chapters are then divided into various **sections** that are organized by stage of the patient experience:

1. *PRE-OP PLANNING – Buprenorphine Strategies*
2. *POST-OP PAIN – Buprenorphine in patients experiencing post op pain*
3. *POST-OP PAIN – Analgesic adjuncts to manage pain (i.e. NSAIDS, Tylenol etc)*
4. *POST-OP PAIN – Opioids to manage pain (i.e. fentanyl, hydromorphone)*
5. *DISCHARGE – Discharge strategies*
6. *OUTPATIENT PROVIDER INVOLVEMENT – indications for involving outpatient provider in these settings*

**PERIOPEARTIVE BUPRENORPHINE MANAGEMENT – PRIVATE AND CONFIDENTIAL – PLEASE DO NOT SHARE****What is the definition of ‘Appropriateness’?**

The RAND/UCLA appropriateness method (which we are using in this guideline development process) allows panellists to rate appropriateness of therapy from 1-9. Median scores of all panellists will be obtained, and consensus definitions will be provided during the second round (in person/teleconference meeting of panel)

**Instructions on how to use the Rater forms:**

- 1) **Print out the forms**
- 2) **Read the Chapter on the top of the page** – I.e. Chapter 1, Section 1.1 reads: “Opioid Use Disorder Only (No Concurrent Pain Disorder)” – this indicates to the panellist to consider patients with opioid use disorder ONLY and no concurrent pain disorder when rating an indication
- 3) **Read across the top of the table** - You will see two big categories, patients who are at LOW risk of ‘Chapter 1’ Disorder Exacerbation and HIGH risk of Chapter 1 Disorder Exacerbation. This directs panellists to stratify patients based on the definitions provided to them and their own experience.
- 4) **Read down the left most column of the table** – The left most column labels the Section within the chapter – “pre-operative planning”. As the panellist scrolls down the left-most column, they will notice that it is divided based on certain clinical characteristics – for example, what dose of buprenorphine the patient is on, how much post-operative pain is expected, and whether a regional anesthesia technique (i.e. nerve block, epidural) is feasible for the surgery for a variety of plausible scenarios.
- 5) **Read Across the INDICATION ROW** –  
Indications are dichotomized. This row indicates the options available to the panellist when rating from 1-9. For example, the first appropriateness rating available to the panellist is Appropriateness of Continuing Buprenorphine with the numbers 1 to 9 below them. This directs the panellist to choose a score for the indication, with a score of ‘9’ being closest to – ‘It is most appropriate to Continue Buprenorphine’, and a score of ‘1’ being closest to ‘It is most appropriate to stop Buprenorphine’. Any scores in between indicates a lack of certainty around the indication.  
Panelists are urged to use the extremes of the rating scale.
- 6) **Use a black pen only to circle** the most appropriate score for the indication.
- 7) **Scan and Email** your forms to [agoel@hsph.harvard.edu](mailto:agoel@hsph.harvard.edu)

PERIOPEARTIVE BUPRENORPHINE MANAGEMENT – PRIVATE AND CONFIDENTIAL – PLEASE DO NOT SHARE

Example – Refer to the colour coding to clarify – this form can only be viewed online or if printed in colour

Example

CHAPTER 1: OPIOID USE DISORDER ONLY (NO CO-OCCURRING PAIN DISORDER) PANELIST # ROUND 1

Definitions: High Risk of Exacerbation includes concurrent mood disorder, duration of therapy <1 year, positive urine drug screen within 1 year

Chapter 1: Opioid Use Disorder (OUD)

Section 1.1: Pre-Op Planning

| INDICATION ROW                                   | LOW-MODERATE Risk of Exacerbation                                  |                                                                     | HIGH Risk of Exacerbation                                             |                                                                      | (Indication Number) |
|--------------------------------------------------|--------------------------------------------------------------------|---------------------------------------------------------------------|-----------------------------------------------------------------------|----------------------------------------------------------------------|---------------------|
|                                                  | Appropriateness of: Continue Buprenorphine Therapy (9) vs Stop (1) | Appropriateness of Maintain (1) vs. Reducing Buprenorphine (9) Dose | Appropriateness of: Continuing Buprenorphine Therapy (9) vs. Stop (1) | Appropriateness of: Maintain (1) vs. Reducing Buprenorphine Dose (9) |                     |
| A. Patient is on 0-8mg SL Buprenorphine Daily    | ----->                                                             | ----->                                                              | <-----                                                                | <-----                                                               | Leave Blank         |
| Severe Post Op Pain expected in an elective case |                                                                    |                                                                     |                                                                       |                                                                      |                     |
| a) With Regional Anesthesia                      | 1 2 3 4 5 6 7 8 9                                                  | 1 2 3 4 5 6 7 8 9                                                   | 1 2 3 4 5 6 7 8 9                                                     | 1 2 3 4 5 6 7 8 9                                                    | 1-4                 |
| b) WithOUT Regional Anesthesia                   | 1 2 3 4 5 6 7 8 9                                                  | 1 2 3 4 5 6 7 8 9                                                   | 1 2 3 4 5 6 7 8 9                                                     | 1 2 3 4 5 6 7 8 9                                                    | 5-8                 |

For a score of 9 on this indication, refer to colour coded elements of the rater box (above) and the composite outcome (below)

*For patients who meet the following criteria:*

- 1) Opioid Use Disorder and No concurrent Pain Disorder
- 2) Low-Moderate Risk of Relapse of underlying disorder
- 3) Taking 0-8 mg of SL buprenorphine daily
- 4) Presenting for surgery where regional anesthesia technique is possible
- 5) Given surgical/patient factors, likely to experience severe post-operative pain

*I believe that it is most appropriate to continue buprenorphine (Score 9 out of 9) at the pre-operative dose (No reduction) (Score 1 out of 9)*

Definition of ‘Risk of Exacerbation’: Please see definitions under specific chapters headings in the panel rating forms

# BMJ Open

## Peri-operative Pain and Addiction Interdisciplinary Network (PAIN) The Perioperative management of Buprenorphine: Protocol for a modified Delphi process

|                                 |                                                                                                                                                                                                                                                                                                                                                                                                                                                                                                                                                                                                                                                                                                                                                                                                                                                                                                                                                                                                                                                                                                                                            |
|---------------------------------|--------------------------------------------------------------------------------------------------------------------------------------------------------------------------------------------------------------------------------------------------------------------------------------------------------------------------------------------------------------------------------------------------------------------------------------------------------------------------------------------------------------------------------------------------------------------------------------------------------------------------------------------------------------------------------------------------------------------------------------------------------------------------------------------------------------------------------------------------------------------------------------------------------------------------------------------------------------------------------------------------------------------------------------------------------------------------------------------------------------------------------------------|
| Journal:                        | <i>BMJ Open</i>                                                                                                                                                                                                                                                                                                                                                                                                                                                                                                                                                                                                                                                                                                                                                                                                                                                                                                                                                                                                                                                                                                                            |
| Manuscript ID                   | bmjopen-2018-027374.R1                                                                                                                                                                                                                                                                                                                                                                                                                                                                                                                                                                                                                                                                                                                                                                                                                                                                                                                                                                                                                                                                                                                     |
| Article Type:                   | Protocol                                                                                                                                                                                                                                                                                                                                                                                                                                                                                                                                                                                                                                                                                                                                                                                                                                                                                                                                                                                                                                                                                                                                   |
| Date Submitted by the Author:   | 11-Jan-2019                                                                                                                                                                                                                                                                                                                                                                                                                                                                                                                                                                                                                                                                                                                                                                                                                                                                                                                                                                                                                                                                                                                                |
| Complete List of Authors:       | Goel, Akash; Harvard University T H Chan School of Public Health, Department of Epidemiology; University of Toronto Department of Anesthesia, University of Toronto<br>Azargive, Saam; Queens University School of Medicine, Department of Anesthesiology and Perioperative Medicine<br>Weissman, J. S.; Harvard University T H Chan School of Public Health; Brigham and Women's Hospital, Center for Surgery and Public Health<br>Shanthanna, Harsha; McMaster, University St Joseph's Health Care, Department of Anesthesia<br>Ladha, Karim; University Health Network, Pain Research Unit; University of Toronto Department of Anesthesia, University of Toronto<br>Lamba, Wiplove; University of Toronto Department of Psychiatry<br>Duggan, Scott; Queens University School of Medicine, Department of Anesthesiology and Perioperative Medicine<br>Hanlon, John; University of Toronto Department of Anesthesia, University of Toronto<br>Di Renna, Tania; University of Toronto Department of Anesthesia, University of Toronto<br>Peng, PW; University of Toronto<br>Clarke, Hance; University Health Network, Pain Research Unit |
| <b>Primary Subject Heading</b>: | Anaesthesia                                                                                                                                                                                                                                                                                                                                                                                                                                                                                                                                                                                                                                                                                                                                                                                                                                                                                                                                                                                                                                                                                                                                |
| Secondary Subject Heading:      | Addiction, Public health                                                                                                                                                                                                                                                                                                                                                                                                                                                                                                                                                                                                                                                                                                                                                                                                                                                                                                                                                                                                                                                                                                                   |
| Keywords:                       | Buprenorphine, SURGERY, Chronic Pain, Opioid Use Disorder, Perioperative Management                                                                                                                                                                                                                                                                                                                                                                                                                                                                                                                                                                                                                                                                                                                                                                                                                                                                                                                                                                                                                                                        |
|                                 |                                                                                                                                                                                                                                                                                                                                                                                                                                                                                                                                                                                                                                                                                                                                                                                                                                                                                                                                                                                                                                                                                                                                            |

SCHOLARONE™  
Manuscripts

**Title:** Perioperative Pain and Addiction Interdisciplinary Network (PAIN)  
The Perioperative management of Buprenorphine: Protocol for a modified Delphi process

### Author Information

Akash Goel M.D.<sup>1,2</sup> [agoel@hsph.harvard.edu](mailto:agoel@hsph.harvard.edu)  
Saam Azargive MSc<sup>3</sup> [sazargive@qmed.ca](mailto:sazargive@qmed.ca)  
Joel S. Weissman PhD<sup>2,4</sup> [jweissman@partners.org](mailto:jweissman@partners.org)  
Harsha Shanthanna M.D. MSc<sup>5</sup> [shanthh@mcmaster.ca](mailto:shanthh@mcmaster.ca)  
Karim Ladha M.D. MSc<sup>6</sup> [karim.ladha@uhn.ca](mailto:karim.ladha@uhn.ca)  
Wiplove Lamba M.D.<sup>7</sup> [lambaw@smh.ca](mailto:lambaw@smh.ca)  
Scott Duggan M.D.<sup>3</sup> [duggans@kgh.kari.net](mailto:duggans@kgh.kari.net)  
John Hanlon M.D. MSc<sup>1</sup> [hanlonj@smh.ca](mailto:hanlonj@smh.ca)  
Tania Di Renna M.D.<sup>1</sup> [tania.direnna@wchospital.ca](mailto:tania.direnna@wchospital.ca)  
Philip Peng M.D., PhD<sup>1</sup> [philip.peng@uhn.ca](mailto:philip.peng@uhn.ca)  
Hance Clarke<sup>10</sup> M.D., PhD<sup>6</sup> [hance.clarke@uhn.ca](mailto:hance.clarke@uhn.ca)

1: Department of Anesthesiology, University of Toronto  
2: T.H. Chan School of Public Health, Harvard University  
3: Department of Anesthesiology and Perioperative Medicine, Queens University School of Medicine  
4: Center for Surgery and Public Health, Brigham and Women's Hospital  
5: Department of Anesthesiology, McMaster University  
6: Pain Research Unit, Department of Anesthesia and Pain Management, Toronto General Hospital  
7: Department of Psychiatry, University of Toronto

### Corresponding Author

Hance Clarke, MD PhD: [hance.clarke@uhn.ca](mailto:hance.clarke@uhn.ca)  
Pain Research Unit  
Department of Anesthesia and Pain Management  
Toronto General Hospital  
Toronto, Ontario  
M5G 2C4  
Cell: +1416 457 4262

### Word Counts

Abstract: 286 words  
Body: 2646 words

### Funding Statement

Harsha Shanthanna is supported by the Canadian Anesthesia Research Foundation grant as a 'Career Investigator Award'.

Funding was provided by the Ontario Ministry of Health and Long Term Care

### Conflicts of Interest

None of the authors declared a conflict of interest

### Key Words

Buprenorphine, Surgery, Substance Use Disorder, Chronic Pain, Perioperative Management, Perioperative Guidelines

**Perioperative Pain and Addiction Interdisciplinary Network (PAIN)**  
**The Perioperative management of Buprenorphine: Protocol for a modified Delphi process**

1  
2  
3 Akash Goel, Saam Azargive, Joel Weissman, Harsha Shanthanna, Karim Ladha, Wiplove  
4 Lamba, Scott Duggan, John Hanlon, Tania Di Renna, Philip Peng, Hance Clarke  
5

## 6 **Abstract**

### 8 **Introduction**

9 The ongoing opioid epidemic has necessitated increasing prescriptions of buprenorphine, which  
10 is evidence-based treatment for opioid use disorder, and also shown to reduce harms associated  
11 with unsafe opioid administration. A systematic review of perioperative management strategies  
12 for patients taking buprenorphine concluded that there was little guidance for managing  
13 buprenorphine perioperatively. The aim of this project is to develop consensus guidelines on the  
14 optimal perioperative management strategies for this group of patients. In this paper we present  
15 the design for a modified Delphi technique that will be used to gain consensus among patients  
16 and multidisciplinary experts in addiction, pain, community and perioperative medicine.  
17

### 18 **Methods and Analysis**

19 A national panel of experts was identified by perioperative, pain, and/or addiction systematic  
20 review authorship, established international profile in perioperative, pain and/or addiction  
21 research, community clinical excellence, and by peer referral. A steering group will develop a first  
22 round a list of indications to be rated by the panel of national experts, patients, and allied health  
23 care professionals. In round 1, the expert panel will rate the appropriateness of each individual  
24 item and provide additional suggestions for revisions, additions, or deletions. The definition for  
25 consensus will be set *a priori*. Consensus will be gauged for both appropriateness and  
26 inappropriateness of treatment strategies. Where agreement is not reached and items are  
27 suggested for addition/deletion/modification, round 2 will take place over teleconference in order  
28 to obtain consensus.  
29

### 30 **Ethics and Dissemination**

31 Institutional REB provided a waiver for this modified Delphi protocol. We plan on developing a  
32 national guideline for the management of patients taking buprenorphine in the perioperative  
33 period that will be generalizable across 3 sets of pre-operative diagnoses including Opioid Use  
34 Disorder and/or Co-occurring Pain Disorders. The findings will be published in peer-reviewed  
35 publications and conference presentations.  
36

### 37 **Article Summary (Strengths and Limitations)**

- 38 1. Existing Perioperative Strategies to manage patients on buprenorphine are based on  
39 expert opinion and regional practices
- 40 2. We will employ a modified Delphi Protocol optimizing medical and geographical diversity  
41 of panellists to ensure the development of a trustworthy set of guidelines
- 42 3. We will aim to include patient and allied-health care experts on our panel to ensure that  
43 the Delphi process and guideline development is patient-centered
- 44 4. Agreement and Disagreement will be measured by apriori agreed upon consensus  
45 criteria
- 46 5. Given that new buprenorphine products are being released and diagnostic scales are  
47 being constantly re-evaluated, we will aim to re-visit our guidelines regularly  
48  
49  
50  
51  
52

### 53 **Introduction**

54  
55 Buprenorphine has been used for opioid detoxification, addiction therapy, acute pain and chronic  
56 pain management since 2002 (1). Its unique pharmacological properties and wide safety profile  
57  
58  
59

1  
2  
3 have made it increasingly prescribed in the chronic pain and addiction patient population. The  
4 number of patients on buprenorphine treatment is increasing (2,3). Since its approval in 2002, the  
5 number of buprenorphine/naloxone tablets sold increased from 8 million in 2005 to over 145  
6 million in 2009. Emerging studies have shown that increasing Medicaid coverage for  
7 Buprenorphine-naloxone has resulted in an overall increase in people filing prescriptions for  
8 buprenorphine-naloxone (4).  
9

10 Until now, inadequate pain management is the main impetus for the perioperative discontinuation  
11 of buprenorphine. Recent evidence suggests that its perioperative discontinuation may hinder  
12 harm reduction by destabilizing patients with opioid use disorder (5). For example, transitioning a  
13 patient off buprenorphine to a full agonist opioid will permit free access to opioid receptors for the  
14 purposes of analgesia, but will not address the substance use disorder that may worsen as a  
15 result (5). Emerging evidence suggests that certain subsets of patients are less likely to  
16 experience deterioration of their substance use disorder (6,7) no matter which strategy is pursued  
17 (continue or discontinue). Furthermore, there remain grave public health concerns over improper  
18 use and/or disposal of full mu-agonists that are prescribed in the peri-operative period.

19 Currently, the quality of evidence regarding perioperative management of patients on  
20 buprenorphine is weak. A systematic review conducted by Goel et al (In press) revealed that the  
21 number of studies to address the perioperative dilemma is limited, and few directly evaluated the  
22 question of continuation versus discontinuation of buprenorphine (8-24). Few studies make  
23 considerations for the possibility of relapse in cases where there has been a history of Opioid Use  
24 Disorder (OUD). Many studies highlighted the importance of multimodal and regional anesthesia  
25 techniques. Furthermore, the only RCT combined patients taking buprenorphine and methadone  
26 into one group (25), limiting the study's applicability to the important question: Should  
27 buprenorphine be continued in the perioperative period or not? It is important that the  
28 perioperative physician consider and balance the issue of pain control vs. patient destabilization.  
29 In fact, the destabilization of a patient with a previous substance abuse problem risks the patient  
30 returning to their previous life struggle; this has significant negative consequences including the  
31 possibility of peri- and postoperative overdose/death.  
32

33 There is a need to develop specific guidance on how to manage OUD perioperatively. Until now,  
34 8 major guidelines (1, 26-32) were built on the backbone of anesthesiologists' opinions and  
35 existing case reports (8-24) (Table 1 of Appendix 1). Many of the existing guidelines propose  
36 discontinuation of buprenorphine before surgery, especially where high-pain is expected.  
37 However, more recently, editorialized guidelines have proposed continuation of buprenorphine  
38 depending on the pre-operative dose and indication (32). Moreover, there is disagreement on the  
39 best discharge strategies for patients taking buprenorphine, irrespective of diagnosis. While most  
40 guidelines agree upon major principles such as multimodal analgesia, there is no consensus on  
41 which strategies are more likely to succeed. Overall, there is disagreement on optimal pre-, intra-,  
42 and post-operative strategies for managing buprenorphine in patients with OUD and/or chronic  
43 pain disorders.

44 Given the lack of RCTs, the strength of a Delphi process is to bring geographically and medically  
45 diverse experts together and determine where there is agreement in the perioperative  
46 management of buprenorphine. Furthermore, this process ensures the integration of  
47 multidisciplinary and patient opinions, resulting in more patient-centered and trustworthy  
48 guidelines.  
49

### 50 **Aim**

51 We will aim to use a national expert consensus Delphi-based survey technique to develop and  
52 evaluate a set of recommendations that address perioperative buprenorphine management  
53 strategies. We will seek to focus on the following factors: 1) Indication for Buprenorphine therapy,  
54 2) Risk of worsening of substance use disorder and/or co-occurring pain disorder, 3) Expected  
55 pain after surgery, 4) Feasibility of perioperative regional anesthesia technique, 5) Utility of  
56 adjunct analgesia and 6) Dose and formulation of buprenorphine therapy. We will follow the 22-  
57  
58  
59

1  
2  
3 step checklist recommended by the RIGHT group (33) for the EQUATOR network.  
4

### 5 **Methods and Design**

6 This study will use a modified Delphi technique, which was developed by the RAND corporation  
7 (34) in order to address complex problems that cannot be solved without a group of experts. The  
8 Delphi technique involves anonymous voting and controlled feedback in order to generate  
9 discussion and eventual consensus on controversial topics. The Delphi method reduces the  
10 likelihood of situations in which group consensus is dominated by the perspectives of a strong  
11 minority (35).  
12

13 An International Research Steering Committee has developed the list of indications, and we plan  
14 to conduct 2 Delphi rounds in which experts rate appropriateness of buprenorphine management.  
15 Panel responses will be de-identified, compiled, analyzed and summarized before being returned  
16 to panelists. The summary report will entail qualitative and quantitative details about individual  
17 panelists' responses compared to their counterparts. It is expected that the panelist can then  
18 review their responses in light of the replies of other panelists prior to a round 2 in-person  
19 discussion and re-rating.  
20

### 21 **Steering Committee**

22 An International Steering Committee (Harvard University, University of Toronto, McMaster  
23 University, Queen's University) was formed to develop and conduct this project and consists of  
24 representation from various disciplines (Anaesthesiology, Family Practice, Epidemiology,  
25 Addictions Medicine, Pain Medicine), geographical areas (Canada, United States) and research  
26 expertise (Delphi, health services, and quantitative methods). A literature review including a  
27 systematic review was conducted by the steering committee to understand the scope of  
28 management strategies published to date. The protocol and associated methods were  
29 established and agreed upon through in-person, telephone, and email communication. Important  
30 functional domains of the research question were considered by the steering committee after  
31 completion of the literature review (i.e. Pre-Operative Management, Post-operative  
32 buprenorphine management, inpatient use of opioids and adjuncts for analgesia, involvement of  
33 outpatient providers, and discharge planning). These domains are represented as 'sections' in the  
34 final questionnaire. Reference was made to previous and published Delphi studies (35,36). There  
35 were 3 drafts reviewed by the Steering committee, and a final draft after a self-test by the steering  
36 committee provided a further set of comments and suggestions.  
37

### 38 **Generation of the Chapters with Indications (Items)**

39 The indications and domains identified from the systematic review (37) were examined along with  
40 the available evidence from existing recommendations on this topic (1, 26-32). Furthermore, case  
41 experience from addiction and pain physicians was used to complete a panel rater-form based on  
42 the RAND questionnaires used in existing studies (34). The form was generated in order to reflect  
43 the essential processes involved in the perioperative experience of patients maintained on  
44 Buprenorphine. In total, 840 indications will be divided into 3 chapters of pre-operative diagnoses.  
45 – 1. Opioid Use Disorder Only, 2. Opioid Use Disorder with Co-occurring Pain Disorder, 3. Pain  
46 Disorder Only. Panellists will indicate their preference for various perioperative strategies  
47 (continue, reduce, stop) by systematically rating these indications from chapters 1 to 3.  
48

### 49 **Selection of National Panel of Experts (Participants and Recruitment)**

50 'Experts' were defined as individuals involved in the management, development, research,  
51 teaching or analysis of clinical perioperative buprenorphine strategies. Because the Delphi group  
52 size depends more on optimizing group dynamics to obtain consensus than statistical analysis,  
53 we aimed for a panel size based on original Delphi methodology from the RAND study (34)  
54 (optimal panel size of 9 and no greater than 15). We set an a priori estimate of panellist attrition  
55 rate (20%) and aimed to select up to 15 panellists for Round 1 (the maximum recommended by  
56 the RAND authors).  
57  
58  
59  
60



To identify experts in the field of addiction and perioperative medicine, we reviewed authorship of published guidelines and case reports of buprenorphine management in the perioperative period; we identified established national and regional profiles in addiction, pain, or perioperative medicine; we solicited peer recommendations from individuals on boards of the National Canadian Pain, Addiction, and Anaesthesiology Societies (CSAM, CPS, CAS). We sought to diversify our panel by selecting panellists with practice experience in all the Canadian provinces, membership on professional societies, and wide-ranging expertise.

We initially reached out to these prospective expert panellists by emailing solicitation letters describing the project and the timelines involved (Appendix 2). Prospective panellists were then asked to complete and return a conflict of interest form (Appendix 3) along with their indication of interest in the project. Conflicts of Interest were reviewed by the Steering Committee and prospective panellists with potential conflicting industry affiliations were removed from the final shortlist. Possible incentives for participation in this process included (1) the opportunity to be selected into a diverse group (2) unique educational opportunities and (3) increased internal and external visibility (1).

### **Patient and Public Involvement**

We included a patient on our steering committee and expert panel in order to develop a research question and outcome measures that were informed by patient priorities, experience, and preferences. Furthermore, inclusion of a nurse practitioner also allowed the panellists to consider the values and preferences of the target population.

### **Ethics**

All participants will be informed that by responding to the questionnaire, they have indicated their consent to participate in the study and have their de-identified responses included in associated analyses. All data will be preserved on paper (under lock and key) as well as a computer (which is password protected) in a locked office, in accordance with standard guidelines. Only the steering committee will have access to the data, which will be destroyed after 5 years in accordance with local guidelines.

We obtained an official waiver from our institutional REB for the conduct of this protocol. The REB deemed our Delphi protocol not to be research as defined in the Tri-Council Policy Statement, and therefore, did not fall under the purview of the REB.

### **Delphi Procedures (Data Collection and Data Analysis)**

We will administer paper questionnaires that will be delivered as attachments to expert panellists by email. Panellists will be asked to print out the questionnaires and complete them on paper. The email will include an instruction form (Appendix 4) that includes a table of contents and a sample exercise grid. Furthermore, a systematic review completed by the steering committee will be provided to panellists as a resource for supplement existing knowledge and experience in this topic. To reduce the likelihood of attrition bias, we will notify the panel that authorship of the final guideline document will be offered only to participants that complete the entire Delphi process.

### **Round 1 & 2 of Delphi Procedure**

The Delphi process will consist of 2 survey rounds. The first round will consist of questionnaires that will be completed remotely by all panellists. Panellists will be blinded to each other's participation in the first round to prevent any communication that may lead to bias in the ratings. The first survey round will extend to 3 weeks, with the first week dedicated to addressing any concerns raised by panellists. In this round, panellists will first be asked to rate the appropriateness of continuing or stopping buprenorphine where: 1 = Very Appropriate to Stop Buprenorphine and 9 = Very Appropriate to Continue Buprenorphine at the same or reduced dose. Next, panellists will be asked to rate the appropriateness of reducing vs maintaining dosage, where: 1 = Very Appropriate to reduce Buprenorphine dosage; and 9 = Very Appropriate to Continue Buprenorphine at the same dosage. Panellists will also be asked to identify potential deletions, modifications, or points of clarification upon return of the rating forms. Furthermore,

1  
2  
3 they will be urged to consider patient populations that will require individualized approaches to the  
4 management of their buprenorphine dose in the perioperative period. Panellists will then scan  
5 and return their rating forms with unique personal identifier codes on each page.  
6

7 In order to identify thresholds for agreement, we will include pre-determined information about  
8 buprenorphine dose, formulation, diagnosis (Pain and/or OUD), risk of exacerbation of underlying  
9 disorder, expected surgical pain, and availability of regional anaesthetic technique in the final list  
10 of indications. These 840 indications will reflect the complete perioperative period, including  
11 strategies for communication with the outpatient provider and utilization of multimodal analgesia.  
12

13 After completion of round 1, a 2-week Analysis Period will ensue, in which two blinded  
14 independent analysts will extract de identified data from rating forms and input data into two  
15 mutually exclusive databases. De-identified results including scores for each indication (including  
16 median and mode scores, interquartile ranges, indications with universal consensus, and  
17 qualitative feedback) along with a narrative report of the findings will be remitted to individual  
18 panellists to review prior to round 2 of the Delphi Process. The second-round meeting will be  
19 conducted in person and over teleconference given the geographic diversity of expert panellists.  
20 Any ambiguous indications, or external factors not previously considered will be aggregated for  
21 discussion during this round. Panellists will have the opportunity to discuss addition or removal of  
22 indications (items) at this point. If indications are deemed to be insufficient (not capturing the  
23 breadth of the theme) or overly inclusive (extreme granularity of indications) then the steering  
24 committee will offer a second round of rating after inclusion or exclusion of culprit items. If  
25 duplicate indications exist, where possible, the steering committee will aim to combine  
26 indications.  
27

### 28 **Definition of Consensus**

29 In any Delphi process, decision rules are determined in advance to both define and determine  
30 consensus. Consensus on a topic is usually determined if a certain number or percentage of the  
31 votes falls within a prescribed range. The Steering Committee has *a priori* decided on its  
32 definition of consensus in order to avoid bias. Using the European Union BIOMED Concerted  
33 Action on Appropriateness for surgical procedures as referenced in the RAND/UCLA  
34 Appropriateness Method User's Manual (34).  
35

36 We define consensus (agreement) in 2 ways: 1) Appropriate treatment defined as a clustering of  
37 scores with a median score in the high end of the scale (7-9) without 'disagreement' (i.e. more  
38 than 2 panellists' scores in the low end of the scale, 1-3) and 2) Inappropriate treatment defined  
39 as a clustering of scores with a median score in the low end of the scale (1-3) without  
40 'disagreement' (i.e. more than 2 panellists' scores in the high end of the scale, 7-9).  
41

### 42 **Development of Guidelines and Recommendations**

43 A final operational manual with decision rules for each indication will be presented to panellists  
44 during the second-round meeting, with accompanying explanatory documents as necessary.  
45 Panellists will be asked to rank and order the recommendations to rationalize the number of items  
46 included in the final guideline as per the EQUATOR network's reporting tool for practice  
47 guidelines in healthcare (RIGHT) (33). An email questionnaire will aim to obtain a final majority  
48 agreement on the synthesis of comments after the 2<sup>nd</sup> round of the Delphi process. It is expected  
49 that clear and concise rationale will accompany individual recommendation statements.  
50

### 51 **Review and Quality Assurance**

52 We plan to use a 2-step process in order to develop and refine an internationally agreed upon  
53 guideline for the perioperative management of patients maintained on buprenorphine. Initially, a  
54 draft guideline will undergo independent review by members external to the steering committee.  
55 Any comments will be addressed explicitly in the final guideline document. A questionnaire will be  
56 emailed out to panellists after the second round to solicit suggestions for improvement in future  
57 iterations.  
58  
59  
60

1  
2  
3  
4 The guideline document should reflect the needs of patients who have co-occurring disorders  
5 where possible, therefore facilitating its use in as many perioperative scenarios as possible. The  
6 final consensus guidelines will be submitted to a perioperative journal and championed by  
7 individual panellists at their home institutions.  
8

9 To test the acceptability of the proposed guidelines due to varying geography and practice  
10 patterns, we will seek annual comments and suggestions from regional and national users of the  
11 guideline. The guideline document should be reviewed annually in order to reflect shifting  
12 evidence and expert opinion.  
13

#### 14 **Funding and management of interests**

15 No funding sources will be used in any stage of the guideline development. Individual steering  
16 committee members and panellists were made to complete conflict of interest forms prior to  
17 involvement in this process. Any prospective steering committee members or panellists with  
18 perceived conflicts of interests were not included at any point of the guideline development.  
19 Original declaration forms outlining conflict of interest are available upon request to the first  
20 author of the study (Akash Goel).  
21

#### 22 **Limitations of the Guideline**

23 Increasingly, providers are beginning to see off-label prescription of sublingual buprenorphine for  
24 patients with pain disorders. Furthermore, there are several new formulations of buprenorphine  
25 emerging. As evidence emerges and new formulations of buprenorphine are developed, these  
26 guidelines will require updating in the future hopefully on an annual basis.  
27

#### 28 **Delphi Study Status**

29 The first round of the Delphi process will begin in October, with an in-person, second round  
30 meeting scheduled in November 2018. Data collection and analysis will occur after the second-  
31 round meeting if panellists and the steering committee are satisfied that all important questions  
32 have been addressed. A paper reporting the results of the Delphi process will be submitted for  
33 publication in early 2019 followed by conference presentations. Data collection will start in  
34 October 2018 and anticipated to be completed by December 2018.  
35

#### 36 **Author Statement**

37 Akash Goel, Joel Weissman and Harsha Shanthanna developed the Delphi Protocol and  
38 methodology  
39

40 Akash Goel and Saam Azargive developed and modified Round 1 panel rating forms  
41

42 Akash Goel, Karim Ladha, Wiplove Lamba, Scott Duggan, John Hanlon, Tania Di Renna, Philip  
43 Peng and Hance Clarke were involved in the development of the research question and  
44 formulation of the Delphi Protocol as part of the Steering Committee  
45

#### 46 **Acknowledgements**

47 We would like to acknowledge Michael Satok-Wolman (our patient advisor) in his contributions to  
48 the development of rater forms and the Delphi process.  
49

50 We would like to acknowledge Kari Van-Kamp (our allied health care representative) in her  
51 contributions as to the development of the Delphi protocol.  
52  
53  
54  
55  
56  
57  
58  
59  
60

## References

1. Anderson TA, Quaye A, Ward E, Wilens T, Hilliard P, Brummet C: To Stop or Not, That Is the Question: Acute Pain Management for the Patient on Chronic Buprenorphine. *Anesthesiology* 2017; 126(6): 1180-6
2. Potter, J.S.; Dreifuss, J.A.; Marino E.N. et al. The multisite prescription opioid addiction treatment study: 18-month outcomes. *Journal of Substance Abuse Treatment* (48)1:62-69, 2015.
3. Weiss, R.D.; Potter, J.S.; Griffin, M.L. et al. Long-term outcomes from the National Drug Abuse Treatment Clinical Trials Network Prescription Opioid Addiction Treatment
4. Saloner B, Levin J, Chang H, Jones C, Alexander GC. Changes in Buprenorphine-Naloxone and Opioid Pain Reliever Prescriptions After the Affordable Care Act Medicaid Expansion. *JAMA Network Open*. 2018;1(4):e181588. doi:10.1001/jamanetworkopen.2018.1588
5. Ward N, Quaye AN, Wilens T: Opioid Use Disorders: Perioperative Management of a Special Population. *Anesth Analg*. 2018; 127(2):539-547
6. Adams E, Sharifi N, Lappalainen L: A Guideline for the clinical management of opioid use disorder; British Columbia Centre on Substance Use; 18-19. Available from at: <http://www.bccsu.ca/care-guidance-publications> - Last Accessed December 4, 2017

- 1
  - 2
  - 3
  - 4
  - 5
  - 6
  - 7
  - 8
  - 9
  - 10
  - 11
  - 12
  - 13
  - 14
  - 15
  - 16
  - 17
  - 18
  - 19
  - 20
  - 21
  - 22
  - 23
  - 24
  - 25
  - 26
  - 27
  - 28
  - 29
  - 30
  - 31
  - 32
  - 33
  - 34
  - 35
  - 36
  - 37
  - 38
  - 39
  - 40
  - 41
  - 42
  - 43
  - 44
  - 45
  - 46
  - 47
  - 48
  - 49
  - 50
  - 51
  - 52
  - 53
  - 54
  - 55
  - 56
  - 57
  - 58
  - 59
  - 60
7. Cornish R, Macleod J, Strang J, Vickerman P, Hickman M: Risk of death during and after opiate substitution treatment in primary care: prospective observational study in UK General Practice Research Database; *BMJ* 2010; 341:c5475
8. Huang A, Katznelson R, de Perrot M, Clarke H: Perioperative Management of a patient undergoing Clagett window closure stabilized on Suboxone for chronic pain: a case report. *Can J Anesthesia* 2014; 61: 826-31
9. Book S, Myrick H, Malcolm R: Buprenorphine for postoperative pain following general surgery in a buprenorphine-maintained patient. *Am J Psychiatry* 2007; 164(6): 979
10. Silva J, Rubinstein A: Continuous Perioperative Sublingual Buprenorphine. *Journal of Pain and Palliative Care Pharmacology* 2016; 30(4): 289-93
11. Chern S, Isserman R, Chen L, Ashburn M, Liu R: Perioperative Pain Management for Patients on Chronic Buprenorphine: A Case Report. *J Anesth Clin Res* 2013; 3(250)
12. Israel J, Poore S: The clinical conundrum of perioperative pain management in patients with opioid dependence: lessons from two cases. *Plast Reconstr Surg* 2013; 131(4): 657
13. Jones, H, Johnson R, Milio L: Post-cesarean pain management of patients maintained on methadone or buprenorphine. *Am J Addict* 2006; 15(3): 258-9
14. Marcucci C, Fudin J, Thomas P, Sandson N, Welsh C: A new pattern of buprenorphine misuse may complicate perioperative pain control. *Anesth Analg* 2009; 108(6): 1996-7
15. Khelemsky Y, Schauer J, Loo N: Effect of buprenorphine on total intravenous anesthetic requirements during spine surgery. *Pain Physician* 2015; 18:261-4
16. McCormick Z, Chu S, Chang-Chien G, Joseph P: Acute pain control challenges with buprenorphine/naloxone therapy in a patient with compartment syndrome secondary to McArdle's Disease: A case report and review. *Pain Physician* 2013; 14: 1187-91
17. Rodgman C, Pletsch, G: Double successful buprenorphine/naloxone induction to facilitate cardiac transplantation in an iatrogenically opiate-dependent patient. *Journal of Addiction Medicine* 2012; 6(2): 177-8
18. Kornfeld H, Manfredi L: Effectiveness of full agonist opioids in patients stabilized on buprenorphine undergoing major surgery: A case series. *American Journal of Therapeutics* 2010; 17: 523-28
19. Hassamal S, Goldenberg M, Ishak W, Haglund M, Miotto K, Danovitch I. Overcoming barriers to initiating medication-assisted treatment for heroin use disorder in a general medical hospital: A case report and narrative literature review. *Journal of Psychiatric Practice* 2017; 23(3): 221-9
20. Brummett C, Trivedi K, Dubovoy A, Berland D: Dexmedetomidine as a novel therapeutic for postoperative pain in a patient treated with buprenorphine. *Journal of Opioid management* 2009; 5(3): 175-9
21. Gupta D, Christensen C, Soskin V: Marked variability in peri-partum anesthetic management of patients on buprenorphine maintenance therapy (BMT): Can there be an underlying acute opioid induced hyperalgesia precipitated by neuraxial opioids in BMT patients? *Middle East J Anaesthesiology* 2013; 22(3): 273-81
22. Macintyre P, Russel R, Usher K, Gaughwin M, Huxtable C: Pain relief and opioid

requirements in the first 24 hours after surgery in patients taking buprenorphine and methadone opioid substitution therapy. *Anaesth Intensive Care* 2013; 41:222-30

23. Meyer M, Paranya G, Norris A, & Howard D: Intrapartum and postpartum analgesia for women maintained on buprenorphine during pregnancy. *European Journal of Pain* 2010; 14(9): 939-43
24. Hansen L, Stone G, Matson C, Tybor D, Pevear M, Smith E: Total Joint Arthroplasty in Patients Taking Methadone or Buprenorphine/Naloxone Preoperatively for Prior Heroin Addiction: A Prospective Matched Cohort Study. *J Arthroplasty* 2016; 31(8):1698-701.
25. Hoflich A, Langer M, Jagsch R, Bawert A, Winklbaaur B, Fischer G, Unger A: Peripartum pain management in opioid dependent women. *Eur J Pain* 2012; 16(4):574-84
26. Childers JW, Arnold RM. Treatment of pain in patients taking buprenorphine for opioid addiction #221. *J Palliat Med* 2012; 15:613-614
27. Bryson EO. The perioperative management of patients maintained on medications used to manage opioid addiction. *Curr Opin Anaesthesiol* 2014; 27:359-364
28. Berry P, Besio S, Brooklyn J, Cimaglio B, Clark R, Davis W, et al.: Vermont Practice Guidelines 2015; Vermont Department of health; division of alcohol and drug abuse programs; office of Vermont health access; 1-30. Available from: [http://contentmanager.med.uvm.edu/docs/default-source/vchip-documents/vchip\\_2buprenorphine\\_guidelines.pdf?sfvrsn=2](http://contentmanager.med.uvm.edu/docs/default-source/vchip-documents/vchip_2buprenorphine_guidelines.pdf?sfvrsn=2) (accessed September, 2018).
29. Sen S, Arulkumar S, Cornett E, Gayle J, Flower R, Fox C, Kaye A: New Pain Management Options for the Surgical patient on Methadone and Buprenorphine. *Curr Pain Headache Rep* 2016; 20:16
30. Brummet C. Management of sublingual buprenorphine in the acute postoperative setting. The University of Michigan Health System 2008. Available from: [http://anes.med.umich.edu/vault/1003149Buprenorphone\\_suboxone\\_subutex\\_perioperative\\_management.pdf](http://anes.med.umich.edu/vault/1003149Buprenorphone_suboxone_subutex_perioperative_management.pdf). (Accessed August 2015)
31. Jonan AB, Kaye AD, Urman RD. Buprenorphine Formulations: Clinical Best Practice Strategies Recommendations for Perioperative Management of Patients Undergoing Surgical or Interventional Pain Procedures. *Pain Physician* 2018; 21:E1-E12
32. Lembke A, Ottestad E, Schmiesing C. Patients Maintained on Buprenorphine for Opioid Use Disorder Should Continue Buprenorphine Through the Perioperative Period. *Pain Medicine*. 2018
33. Chen Y, Yang K, Marusic Q, Qaseem A, Meerpohl JJ, Flottorp S, Aki EA, Schunemann HJ, Chan ESY, Falck-Ytter Y, Ahmed F, Barber S, Chen C, Zhang M, Xu B, Tian J, Song F, Shang H, Tang K, Wang Q, Norris SL. A reporting Tool for the practice guidelines in healthcare: The RIGHT statement. *Ann Internal Med*. 2017;166(2): 128-132
34. Fitch, K., Bernstein, S. J., Aguilar, M. D., Burnand, B., LaCalle, J. R., Lázaro, P., . . . Kahan, J. P. (2001). (). The RAND/UCLA Appropriateness Method User's Manual Santa Monica, CA: Rand Health.
35. Slade SC, Dionne CE, Underwood M, *et al*. Standardised method for reporting exercise programmes: protocol for a modified Delphi study *BMJ Open* 2014;4:e006682. doi: 10.1136/bmjopen-2014-006682

- 1  
2  
3  
4 36. Okoli C, Pawlowski SD. The Delphi method as a research tool: an example, design  
5 considerations and applications. *Inform Manag* 2004;**42**:15–29. doi:10.1016/j.im.2003.11.002  
6  
7 37. Goel A, Azargive S, Hanlon J, Ladha K, *et al* The Perioperative Patient on Buprenorphine: A  
8 Systematic Review of perioperative management strategies and patient outcomes. In Press,  
9 Canadian Journal of Anesthesia 2018  
10  
11  
12  
13  
14  
15  
16  
17  
18  
19  
20  
21  
22  
23  
24  
25  
26  
27  
28  
29  
30  
31  
32  
33  
34  
35  
36  
37  
38  
39  
40  
41  
42  
43  
44  
45  
46  
47  
48  
49  
50  
51  
52  
53  
54  
55  
56  
57  
58  
59  
60

| Title                      | Date | Major Peri-operative recommendations                                                                                                                                                                                                                                                                                                                                                                                                                                                                                                                                                                                                                                                                                                                                                                                                                              |
|----------------------------|------|-------------------------------------------------------------------------------------------------------------------------------------------------------------------------------------------------------------------------------------------------------------------------------------------------------------------------------------------------------------------------------------------------------------------------------------------------------------------------------------------------------------------------------------------------------------------------------------------------------------------------------------------------------------------------------------------------------------------------------------------------------------------------------------------------------------------------------------------------------------------|
| Anderson et al             | 2017 | <ol style="list-style-type: none"> <li>1. Where moderate to severe pain is expected, cancel surgery such that buprenorphine is weaned off before surgery and short-acting opioids are used to replace it.</li> <li>2. A plan for follow-up and reinstatement of therapy should be established</li> <li>3. Anticipate patient's opioids requirements will be similar to an opioid-tolerant patient</li> <li>4. Consider adjuncts – NSAIDs, membrane stabilizers, acetaminophen, local anaesthetics, regional anesthetic techniques</li> <li>5. Ensure appropriate outpatient follow-up with buprenorphine provider</li> </ol>                                                                                                                                                                                                                                      |
| Sen et al                  | 2016 | <ol style="list-style-type: none"> <li>1. Discontinue buprenorphine 72H before operative procedure, or replace buprenorphine with methadone</li> <li>2. Expect additional opioid doses for acute pain control</li> <li>3. Discharge on pure opioid induction protocol of buprenorphine in conjunction with primary provider</li> </ol>                                                                                                                                                                                                                                                                                                                                                                                                                                                                                                                            |
| Jonan et al                | 2018 | <ol style="list-style-type: none"> <li>1. Utilize non-opioid adjuncts, regional Anesthesia, and local anesthetic infiltration by surgeon where possible.</li> <li>2. Where low post operative pain is expected, continue buprenorphine perioperatively without taper</li> <li>3. Where intermediate pain is expected, discontinue buprenorphine 3 days prior to procedure, consider high dose PCA, and consider ICU admission for respiratory monitoring</li> <li>4. Where High pain is expected, discontinue buprenorphine 3-5 days prior to procedure, consider pure opioid agonist to manage withdrawal, and consider ICU for respiratory monitoring</li> </ol>                                                                                                                                                                                                |
| Childers and Arnold        | 2012 | <ol style="list-style-type: none"> <li>1. Adjuvant analgesics and interventional procedures should be provided if available</li> <li>2. Hold buprenorphine and start short acting opioid agonists if expecting moderate to severe pain</li> <li>3. Re-initiate buprenorphine in the post-operative period with the buprenorphine provider</li> <li>4. Where mild to moderate pain is expected, consider treating pain with buprenorphine alone, or use short-acting opioid agonists at higher doses</li> <li>5. Consider replacing buprenorphine with methadone for opioid addiction where ongoing pain management is expected</li> </ol>                                                                                                                                                                                                                         |
| Bryson                     | 2014 | <ol style="list-style-type: none"> <li>1. Ideally, buprenorphine should be discontinued 72H before surgery, then restarted once patient no longer has acute pain requiring narcotic analgesics</li> <li>2. If the plan is to continue buprenorphine, use short-acting opioid analgesics to achieve pain control, expecting higher than normal effective doses. Divide buprenorphine maintenance dose and administer every 6-8 hours</li> <li>3. If the plan is to stop the buprenorphine, use standard opioids for analgesia, conduct a slow taper over 2 weeks or an abrupt taper over 3 days, remaining buprenorphine free for 72 hours before surgery</li> <li>4. If the relapse rate is too high, replace maintenance dose of buprenorphine with methadone before surgery, and use another short-acting opioid and analgesic for breakthrough pain</li> </ol> |
| Berry (Vermont Guidelines) | 2015 | <ol style="list-style-type: none"> <li>1. Reduce buprenorphine dose to 8mg SL on the day of surgery</li> <li>2. Use oxycodone or other full agonists to make up opiate debt + typical post operative course management</li> <li>3. Expect longer than normal pain management regimen in the post operative period</li> <li>4. Buprenorphine doses above 10mg daily will block opioid analgesics for pain</li> </ol>                                                                                                                                                                                                                                                                                                                                                                                                                                               |
| Lembke et al. (Editorial)  | 2018 | <ol style="list-style-type: none"> <li>1. Continue buprenorphine in the perioperative period for patients taking 12mg SL or less</li> <li>2. Taper buprenorphine to 12 mg SL 2-3 days pre-op</li> <li>3. Multimodal analgesia, Regional techniques where possible</li> <li>4. Higher than normal doses of opioids to treat pain for 2-4 days post-op</li> </ol>                                                                                                                                                                                                                                                                                                                                                                                                                                                                                                   |



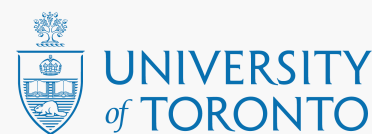

Dear Prospective Panelist,

We are writing to you to because you have been nominated for a special expert consensus panel. This Panel will be establishing guidelines on the perioperative management of patients who are taking buprenorphine for the management of pain and/or substance use disorder.

We will be embarking on this project because current evidence provides little guidance as to how best to manage this group of patients. Our group has conducted a systematic review of the existing evidence and we hope to use this for the basis of conducting a 2-staged Delphi process resulting in consensus on appropriateness of continuing or stopping buprenorphine in the perioperative period.

This process involves the following steps and timeline:

| Task                                                                                                                                     | Timeline                      |
|------------------------------------------------------------------------------------------------------------------------------------------|-------------------------------|
| Review of existing literature (Complete)                                                                                                 | Complete                      |
| <b>Nomination of experts in Addiction medicine, pain medicine, and Anesthesiology</b><br>Obtain CVs, Conflict of Interest Forms (Delphi) | By September                  |
| <b>Confirmation of Panel by Core Committee</b><br><b>Dissemination of Core Materials to Expert Panel</b>                                 | By September 15               |
| Review of evidence by expert panel (remotely done)                                                                                       | By September 31 <sup>st</sup> |
| Review of consensus statements (remotely done)                                                                                           | By September 31 <sup>st</sup> |
| Submission of consensus statements, and collation of data                                                                                | By September 31 <sup>st</sup> |
| Meeting by Teleconference/In-person to review consensus and/or conflicts                                                                 | By October 31st               |
| Development of consensus                                                                                                                 | By December 30th              |
| Publication of consensus document                                                                                                        | By January 2019               |

As part of the nomination process, we are seeking recognized experts as part of the Canadian Society of Addiction Medicine (CSAM), CPS (Canadian Pain Society) and CAS (Canadian Anesthesiologists' Society). You were nominated based on the following 4 criteria:

|                                  |
|----------------------------------|
| Leadership in the specialty      |
| Absence of conflicts of interest |
| Geographic diversity             |
| Diversity of practice setting    |

We would be delighted to have you serve on this panel, and would be happy to answer any questions you may have about the process. Please return your CVs and COI forms to me by August 4 if you are interested in pursuing this opportunity.

Sincerely,

The Steering Committee

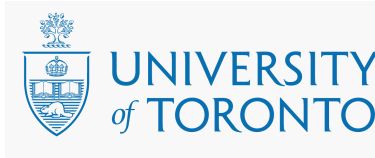

# CANADIAN BUPRENORPHINE CONSENSUS GUIDELINES

## CONFLICT OF INTEREST DISCLOSURE FORM

**The following are examples of conflicts of interest:**

- Any direct financial interest in a for-profit entity such as a pharmaceutical organization, medical devices company, communications firm, or other financial supporter
- Current or recent participation in a clinical trial sponsored by the Organization
- Membership with a speakers bureau
- Holding of a patent for a product referred to in the CPD activity or marketed by a commercial organization
- Receiving honoraria to speak on behalf of a pharmaceutical organization or medical communication company, including talks for which the individual has been contracted but has not yet received payment for
- Financial relationships with program-sponsoring organizations that are non-pharmaceutical or non-health care organizations (eg, insurance companies, financial institutions, government, for-profit organizations, other non-profit organizations)

I, \_\_\_\_\_ declare no conflict of interest

I, \_\_\_\_\_ declare the following conflicts of interest  
(Please list below)

Signature \_\_\_\_\_ -

Name \_\_\_\_\_

Title \_\_\_\_\_

**PERIOPEARTIVE BUPRENORPHINE MANAGEMENT – PRIVATE AND CONFIDENTIAL – PLEASE DO NOT SHARE**Perioperative Management of Buprenorphine Products**Panel Instructions**

Dear Panellist,

Thank you for your participation in the national guideline development for managing patients taking buprenorphine products in the perioperative period. Below you will find some definitions and instructions for how to fill out the panel rating forms.

There are 840 indications that you will be required to rate.

**How does the Modified Delphi process work?**

There are 2 rounds of ratings – the first round is done in a ‘blinded’ fashion where panellists are not aware of who the other panellists are, and are not meant to discuss their thoughts with each other. They are to fill out rater forms and return them to the **moderator**. There will be a second round where panellists will meet in person and teleconference to discuss discrepancies in their rating and aim to obtain consensus on conflicting areas.

**How are the rating forms organized?**

There are 3 **chapters** that are focused on the diagnosis of the patient prior to surgery

1. *OPIOID USE DISORDER ONLY (No co-occurring pain disorder) – 280 indications*
2. *OPIOID USE DISORDER AND PAIN DISORDER – 280 indications*
3. *PAIN DISORDER ONLY (No co-occurring opioid use disorder) – 280 indications*

These chapters are then divided into various **sections** that are organized by stage of the patient experience:

1. *PRE-OP PLANNING – Buprenorphine Strategies*
2. *POST-OP PAIN – Buprenorphine in patients experiencing post op pain*
3. *POST-OP PAIN – Analgesic adjuncts to manage pain (i.e. NSAIDS, Tylenol etc)*
4. *POST-OP PAIN – Opioids to manage pain (i.e. fentanyl, hydromorphone)*
5. *DISCHARGE – Discharge strategies*
6. *OUTPATIENT PROVIDER INVOLVEMENT – indications for involving outpatient provider in these settings*

**PERIOPEARTIVE BUPRENORPHINE MANAGEMENT – PRIVATE AND CONFIDENTIAL – PLEASE DO NOT SHARE****What is the definition of ‘Appropriateness’?**

The RAND/UCLA appropriateness method (which we are using in this guideline development process) allows panellists to rate appropriateness of therapy from 1-9. Median scores of all panellists will be obtained, and consensus definitions will be provided during the second round (in person/teleconference meeting of panel)

**Instructions on how to use the Rater forms:**

- 1) **Print out the forms**
- 2) **Read the Chapter on the top of the page** – I.e. Chapter 1, Section 1.1 reads: “Opioid Use Disorder Only (No Concurrent Pain Disorder)” – this indicates to the panellist to consider patients with opioid use disorder ONLY and no concurrent pain disorder when rating an indication
- 3) **Read across the top of the table** - You will see two big categories, patients who are at LOW risk of ‘Chapter 1’ Disorder Exacerbation and HIGH risk of Chapter 1 Disorder Exacerbation. This directs panellists to stratify patients based on the definitions provided to them and their own experience.
- 4) **Read down the left most column of the table** – The left most column labels the Section within the chapter – “pre-operative planning”. As the panellist scrolls down the left-most column, they will notice that it is divided based on certain clinical characteristics – for example, what dose of buprenorphine the patient is on, how much post-operative pain is expected, and whether a regional anesthesia technique (i.e. nerve block, epidural) is feasible for the surgery for a variety of plausible scenarios.
- 5) **Read Across the INDICATION ROW** –  
Indications are dichotomized. This row indicates the options available to the panellist when rating from 1-9. For example, the first appropriateness rating available to the panellist is Appropriateness of Continuing Buprenorphine with the numbers 1 to 9 below them. This directs the panellist to choose a score for the indication, with a score of ‘9’ being closest to – ‘It is most appropriate to Continue Buprenorphine’, and a score of ‘1’ being closest to ‘It is most appropriate to stop Buprenorphine’. Any scores in between indicates a lack of certainty around the indication.

Panelists are urged to use the extremes of the rating scale.

- 6) **Use a black pen** only to **circle** the most appropriate score for the indication.
- 7) **Scan and Email** your forms to [agoel@hsph.harvard.edu](mailto:agoel@hsph.harvard.edu)

PERIOPEARTIVE BUPRENORPHINE MANAGEMENT – PRIVATE AND CONFIDENTIAL – PLEASE DO NOT SHARE

Example – Refer to the colour coding to clarify – this form can only be viewed online or if printed in colour

Example

CHAPTER 1: OPIOID USE DISORDER ONLY (NO CO-OCCURRING PAIN DISORDER) PANELIST # ROUND 1

Definitions: High Risk of Exacerbation includes concurrent mood disorder, duration of therapy <1 year, positive urine drug screen within 1 year

Chapter 1: Opioid Use Disorder (OUD)

Section 1.1: Pre-Op Planning

| INDICATION ROW                                   | LOW-MODERATE Risk of Exacerbation                                  |                                                                     | HIGH Risk of Exacerbation                                             |                                                                      | (Indication Number) |
|--------------------------------------------------|--------------------------------------------------------------------|---------------------------------------------------------------------|-----------------------------------------------------------------------|----------------------------------------------------------------------|---------------------|
|                                                  | Appropriateness of: Continue Buprenorphine Therapy (9) vs Stop (1) | Appropriateness of Maintain (1) vs. Reducing Buprenorphine (9) Dose | Appropriateness of: Continuing Buprenorphine Therapy (9) vs. Stop (1) | Appropriateness of: Maintain (1) vs. Reducing Buprenorphine Dose (9) |                     |
| A. Patient is on 0-8mg SL Buprenorphine Daily    | ----->                                                             | ----->                                                              | <-----                                                                | <-----                                                               | Leave Blank         |
| Severe Post Op Pain expected in an elective case |                                                                    |                                                                     |                                                                       |                                                                      |                     |
| a) With Regional Anesthesia                      | 1 2 3 4 5 6 7 8 9                                                  | 1 2 3 4 5 6 7 8 9                                                   | 1 2 3 4 5 6 7 8 9                                                     | 1 2 3 4 5 6 7 8 9                                                    | 1-4                 |
| b) WithOUT Regional Anesthesia                   | 1 2 3 4 5 6 7 8 9                                                  | 1 2 3 4 5 6 7 8 9                                                   | 1 2 3 4 5 6 7 8 9                                                     | 1 2 3 4 5 6 7 8 9                                                    | 5-8                 |

For a score of 9 on this indication, refer to colour coded elements of the rater box (above) and the composite outcome (below)

*For patients who meet the following criteria:*

- 1) Opioid Use Disorder and No concurrent Pain Disorder
- 2) Low-Moderate Risk of Relapse of underlying disorder
- 3) Taking 0-8 mg of SL buprenorphine daily
- 4) Presenting for surgery where regional anesthesia technique is possible
- 5) Given surgical/patient factors, likely to experience severe post-operative pain

*I believe that it is most appropriate to continue buprenorphine (Score 9 out of 9) at the pre-operative dose (No reduction) (Score 1 out of 9)*

Definition of ‘Risk of Exacerbation’: Please see definitions under specific chapters headings in the panel rating forms

# BMJ Open

**Perioperative Pain and Addiction Interdisciplinary Network  
(PAIN):  
Protocol of a Practice Advisory for the Perioperative  
Management of Buprenorphine using a Modified Delphi  
Process**

|                                 |                                                                                                                                                                                                                                                                                                                                                                                                                                                                                                                                                                                                                                                                                                                                                                                                                                                                                                                                                                                                                                                                                                                                            |
|---------------------------------|--------------------------------------------------------------------------------------------------------------------------------------------------------------------------------------------------------------------------------------------------------------------------------------------------------------------------------------------------------------------------------------------------------------------------------------------------------------------------------------------------------------------------------------------------------------------------------------------------------------------------------------------------------------------------------------------------------------------------------------------------------------------------------------------------------------------------------------------------------------------------------------------------------------------------------------------------------------------------------------------------------------------------------------------------------------------------------------------------------------------------------------------|
| Journal:                        | <i>BMJ Open</i>                                                                                                                                                                                                                                                                                                                                                                                                                                                                                                                                                                                                                                                                                                                                                                                                                                                                                                                                                                                                                                                                                                                            |
| Manuscript ID                   | bmjopen-2018-027374.R2                                                                                                                                                                                                                                                                                                                                                                                                                                                                                                                                                                                                                                                                                                                                                                                                                                                                                                                                                                                                                                                                                                                     |
| Article Type:                   | Protocol                                                                                                                                                                                                                                                                                                                                                                                                                                                                                                                                                                                                                                                                                                                                                                                                                                                                                                                                                                                                                                                                                                                                   |
| Date Submitted by the Author:   | 14-Mar-2019                                                                                                                                                                                                                                                                                                                                                                                                                                                                                                                                                                                                                                                                                                                                                                                                                                                                                                                                                                                                                                                                                                                                |
| Complete List of Authors:       | Goel, Akash; Harvard University T H Chan School of Public Health, Department of Epidemiology; University of Toronto Department of Anesthesia, University of Toronto<br>Azargive, Saam; Queens University School of Medicine, Department of Anesthesiology and Perioperative Medicine<br>Weissman, J. S.; Harvard University T H Chan School of Public Health; Brigham and Women's Hospital, Center for Surgery and Public Health<br>Shanthanna, Harsha; McMaster, University St Joseph's Health Care, Department of Anesthesia<br>Ladha, Karim; University Health Network, Pain Research Unit; University of Toronto Department of Anesthesia, University of Toronto<br>Lamba, Wiplove; University of Toronto Department of Psychiatry<br>Duggan, Scott; Queens University School of Medicine, Department of Anesthesiology and Perioperative Medicine<br>Hanlon, John; University of Toronto Department of Anesthesia, University of Toronto<br>Di Renna, Tania; University of Toronto Department of Anesthesia, University of Toronto<br>Peng, PW; University of Toronto<br>Clarke, Hance; University Health Network, Pain Research Unit |
| <b>Primary Subject Heading</b>: | Anaesthesia                                                                                                                                                                                                                                                                                                                                                                                                                                                                                                                                                                                                                                                                                                                                                                                                                                                                                                                                                                                                                                                                                                                                |
| Secondary Subject Heading:      | Addiction, Public health                                                                                                                                                                                                                                                                                                                                                                                                                                                                                                                                                                                                                                                                                                                                                                                                                                                                                                                                                                                                                                                                                                                   |
| Keywords:                       | Buprenorphine, SURGERY, Chronic Pain, Opioid Use Disorder, Perioperative Management                                                                                                                                                                                                                                                                                                                                                                                                                                                                                                                                                                                                                                                                                                                                                                                                                                                                                                                                                                                                                                                        |
|                                 |                                                                                                                                                                                                                                                                                                                                                                                                                                                                                                                                                                                                                                                                                                                                                                                                                                                                                                                                                                                                                                                                                                                                            |

SCHOLARONE™  
Manuscripts

**Title:** Perioperative Pain and Addiction Interdisciplinary Network (PAIN): Protocol of a Practice Advisory for the Perioperative Management of Buprenorphine using a Modified Delphi Process

### Author Information

Akash Goel M.D.<sup>1,2</sup> [goel@hsph.harvard.edu](mailto:goel@hsph.harvard.edu)  
Saam Azargive MSc<sup>3</sup> [sazargive@qmed.ca](mailto:sazargive@qmed.ca)  
Joel S. Weissman PhD<sup>2,4</sup> [jweissman@partners.org](mailto:jweissman@partners.org)  
Harsha Shanthanna M.D. MSc<sup>5</sup> [shanthh@mcmaster.ca](mailto:shanthh@mcmaster.ca)  
Karim Ladha M.D. MSc<sup>6</sup> [karim.ladha@uhn.ca](mailto:karim.ladha@uhn.ca)  
Wiplove Lamba M.D.<sup>7</sup> [lambaw@smh.ca](mailto:lambaw@smh.ca)  
Scott Duggan M.D.<sup>3</sup> [duggans@kgh.kari.net](mailto:duggans@kgh.kari.net)  
John Hanlon M.D. MSc<sup>1</sup> [hanlonj@smh.ca](mailto:hanlonj@smh.ca)  
Tania Di Renna M.D.<sup>1</sup> [tania.direnna@wchospital.ca](mailto:tania.direnna@wchospital.ca)  
Philip Peng M.D., PhD<sup>1</sup> [philip.peng@uhn.ca](mailto:philip.peng@uhn.ca)  
Hance Clarke<sup>10</sup> M.D., PhD<sup>6</sup> [hance.clarke@uhn.ca](mailto:hance.clarke@uhn.ca)

1: Department of Anesthesiology, University of Toronto

2: T.H. Chan School of Public Health, Harvard University

3: Department of Anesthesiology and Perioperative Medicine, Queens University School of Medicine

4: Center for Surgery and Public Health, Brigham and Women's Hospital

5: Department of Anesthesiology, McMaster University

6: Pain Research Unit, Department of Anesthesia and Pain Management, Toronto General Hospital

7: Department of Psychiatry, University of Toronto

### Corresponding Author

Hance Clarke, MD PhD: [hance.clarke@uhn.ca](mailto:hance.clarke@uhn.ca)  
Pain Research Unit  
Department of Anesthesia and Pain Management  
Toronto General Hospital  
Toronto, Ontario  
M5G 2C4  
Cell: +1416 457 4262

### Word Counts

Abstract: 291 words

Body: 2940 words

### Funding Statement

Harsha Shanthanna is supported by the Canadian Anesthesia Research Foundation grant as a 'Career Investigator Award'.

Hance Clarke and Karim Ladha are supported by the Ontario Ministry of Health and Long Term Care and by Merit Awards by the Department of Anaesthesia, University of Toronto.

Funding was provided by the Ontario Ministry of Health and Long Term Care

### Conflicts of Interest

None of the authors declared a conflict of interest

### Key Words

Buprenorphine, Surgery, Substance Use Disorder, Chronic Pain, Perioperative Management, Perioperative Guidelines

1  
2  
3  
4  
5  
6  
7  
8  
9  
10  
11  
12  
13  
14  
15  
16  
17  
18  
19  
20  
21  
22  
23  
24  
25  
26  
27  
28  
29  
30  
31  
32  
33  
34  
35  
36  
37  
38  
39  
40  
41  
42  
43  
44  
45  
46  
47  
48  
49  
50  
51  
52  
53  
54  
55  
56  
57  
58  
59  
60

For peer review only



## Perioperative Pain and Addiction Interdisciplinary Network (PAIN):

Protocol of a Practice Advisory for the Perioperative Management of Buprenorphine using a Modified Delphi Process

Akash Goel, Saam Azargive, Joel Weissman Harsha Shanthanna, Karim Ladha, Wiplove Lamba, Scott Duggan, John Hanlon, Tania Di Renna, Philip Peng, Hance Clarke

### Abstract

#### Introduction

The ongoing opioid epidemic has necessitated increasing prescriptions of buprenorphine, which is evidence-based treatment for opioid use disorder, and also shown to reduce harms associated with unsafe opioid administration. A systematic review of perioperative management strategies for patients taking buprenorphine concluded that there was little guidance for managing buprenorphine perioperatively. The aim of this project is to develop consensus guidelines on the optimal perioperative management strategies for this group of patients. In this paper we present the design for a modified Delphi technique that will be used to gain consensus among patients and multidisciplinary experts in addiction, pain, community and perioperative medicine.

#### Methods and Analysis

A national panel of experts was identified by perioperative, pain, and/or addiction systematic review authorship, established international profile in perioperative, pain and/or addiction research, community clinical excellence, and by peer referral. A steering group will develop a first round a list of indications to be rated by the panel of national experts, patients, and allied health care professionals. In round 1, the expert panel will rate the appropriateness of each individual item and provide additional suggestions for revisions, additions, or deletions. The definition for consensus will be set *a priori*. Consensus will be gauged for both appropriateness and inappropriateness of treatment strategies. Where agreement is not reached and items are suggested for addition/deletion/modification, round 2 will take place over teleconference in order to obtain consensus.

#### Ethics and Dissemination

Institutional REB provided a waiver for this modified Delphi protocol. We plan on developing a national guideline for the management of patients taking buprenorphine in the perioperative period that will be generalizable across 3 sets of pre-operative diagnoses including Opioid Use Disorder and/or Co-occurring Pain Disorders. The findings will be published in peer-reviewed publications and conference presentations.

#### Article Summary (Strengths and Limitations)

1. Existing Perioperative Strategies to manage patients on buprenorphine are based on expert opinion and regional practices
2. We will employ a modified Delphi Protocol optimizing medical and geographical diversity of panellists to ensure the development of a trustworthy set of guidelines
3. We will aim to include patient and allied-health care experts on our panel to ensure that the Delphi process and guideline development is patient-centered
4. Agreement and Disagreement will be measured by a priori agreed upon consensus criteria
5. Given that new buprenorphine products are being released and diagnostic scales are being constantly re-evaluated, we will aim to re-visit our guidelines regularly

## Introduction

Buprenorphine has been used for medically supervised withdrawal, historically referred to as detoxification, opioid use disorder (OUD), acute pain and chronic pain management since 2002 (1). Its unique pharmacological properties and wide safety profile have made it increasingly prescribed in the chronic pain and OUD patient population. The number of patients on buprenorphine treatment is increasing (2,3). Since its approval in 2002, the number of buprenorphine/naloxone tablets sold increased from 8 million in 2005 to over 145 million in 2009. Emerging studies have shown that increasing Medicaid coverage for Buprenorphine-naloxone has resulted in an overall increase in people filing prescriptions for buprenorphine-naloxone (4).

Until now, inadequate pain management is the main impetus for the perioperative discontinuation of buprenorphine. Recent evidence suggests that its perioperative discontinuation may hinder harm reduction by destabilizing patients with OUD (5). For example, transitioning a patient off buprenorphine to a full agonist opioid will permit free access to opioid receptors for the purposes of analgesia, but will not address the OUD that may worsen as a result (5). Emerging evidence suggests that certain subsets of patients are less likely to experience deterioration of their OUD (6,7) no matter which strategy is pursued (continue or discontinue). Furthermore, there remain grave public health concerns over improper use and/or disposal of full mu-agonists that are prescribed in the peri-operative period.

Currently, the quality of evidence regarding perioperative management of patients on buprenorphine is weak. A systematic review conducted by Goel et al revealed that the number of studies to address the perioperative dilemma is limited, and few directly evaluated the question of continuation versus discontinuation of buprenorphine (8-24). Few studies make considerations for the possibility of relapse in cases where there has been a history of OUD. Many studies highlighted the importance of multimodal and regional anesthesia techniques. Furthermore, the only RCT combined patients taking buprenorphine and methadone into one group (25), limiting the study's applicability to the important question: Should buprenorphine be continued in the perioperative period or not? It is important that the perioperative physician consider and balance the issue of pain control vs. patient destabilization. In fact, the destabilization of a patient with an OUD risks the patient returning to the drug; this has significant negative consequences including the possibility of peri- and postoperative overdose/death.

There is a need to develop specific guidance on how to manage OUD perioperatively. Until now, 8 major guidelines (1, 26-32) were built on the backbone of anesthesiologists' opinions and existing case reports (8-24) (Table 1 of Appendix 1). Many of the existing guidelines propose discontinuation of buprenorphine before surgery, especially where high-pain is expected. However, more recently, editorialized guidelines have proposed continuation of buprenorphine depending on the pre-operative dose and indication (32). Moreover, there is disagreement on the best discharge strategies for patients taking buprenorphine, irrespective of diagnosis. While most guidelines agree upon major principles such as multimodal analgesia, there is no consensus on which strategies are more likely to succeed. Overall, there is disagreement on optimal pre-, intra-, and post-operative strategies for managing buprenorphine in patients with OUD and/or chronic pain disorders.

Given the lack of RCTs, the strength of a Delphi process is to bring geographically and medically diverse experts together and determine where there is agreement in the perioperative management of buprenorphine. Furthermore, this process ensures the integration of multidisciplinary and patient opinions, resulting in more patient-centered and trustworthy guidelines.

## Aim

We will aim to use a national expert consensus Delphi-based survey technique to develop and evaluate a set of recommendations that address perioperative buprenorphine management strategies. We will seek to focus on the following factors: 1) Indication for Buprenorphine therapy, 2) Risk of worsening of OUD and/or co-occurring pain disorder, 3) Expected pain after surgery, 4) Feasibility of perioperative regional anesthesia technique, 5) Utility of adjunct analgesia and 6) Dose and formulation of buprenorphine therapy. We will follow the 22-step checklist recommended

1  
2  
3 by the RIGHT group (33) for the EQUATOR network.  
4

### 5 **Methods and Design**

6 This study will use a modified Delphi technique, which was developed by the RAND corporation  
7 (34) in order to address complex problems that cannot be solved without a group of experts. The  
8 Delphi technique involves anonymous voting and controlled feedback in order to generate  
9 discussion and eventual consensus on controversial topics. The Delphi method reduces the  
10 likelihood of situations in which group consensus is dominated by the perspectives of a strong  
11 minority (35).  
12

13 An International Research Steering Committee (Perioperative Pain and Addiction Network) has  
14 developed the list of indications, and we plan to conduct 2 Delphi rounds in which experts rate  
15 appropriateness of buprenorphine management. Panel responses will be de-identified, compiled,  
16 analyzed and summarized before being returned to panelists. The summary report will entail  
17 qualitative and quantitative details about individual panelists' responses compared to their  
18 counterparts. It is expected that the panelist can then review their responses in light of the replies  
19 of other panelists prior to a round 2 in-person discussion and re-rating.  
20

### 21 **Steering Committee**

22 An International Steering Committee (Harvard University, University of Toronto, McMaster  
23 University, Queen's University) was formed to develop and conduct this project and consists of  
24 representation from various disciplines (Anaesthesiology, Family Practice, Epidemiology,  
25 Addictions Medicine, Pain Medicine), geographical areas (Canada, United States) and research  
26 expertise (Delphi, health services, and quantitative methods), referred to collectively as the  
27 Perioperative Pain and Addiction Network (PAIN). A literature review including a systematic review  
28 was conducted by the steering committee to understand the scope of management strategies  
29 published to date. The protocol and associated methods were established and agreed upon through  
30 in-person, telephone, and email communication. Important functional domains of the research  
31 question were considered by the steering committee after completion of the literature review (i.e.  
32 Pre-Operative Management, Post-operative buprenorphine management, inpatient use of opioids  
33 and adjuncts for analgesia, involvement of outpatient providers, and discharge planning). These  
34 domains are represented as 'sections' in the final questionnaire. Reference was made to previous  
35 and published Delphi studies (35,36). There were 3 drafts reviewed by the Steering committee, and  
36 a final draft after a self-test by the steering committee provided a further set of comments and  
37 suggestions.  
38

### 39 **Generation of the Chapters with Indications (Items)**

40 The indications and domains identified from the systematic review (37) were examined along with  
41 the available evidence from existing recommendations on this topic (1, 26-32). Furthermore, case  
42 experience from addiction and pain physicians was used to complete a panel rater-form based on  
43 the RAND questionnaires used in existing studies (34). The form was generated in order to reflect  
44 the essential processes involved in the perioperative experience of patients maintained on  
45 Buprenorphine. In total, 840 indications will be divided into 3 chapters of pre-operative diagnoses.  
46 - 1. Opioid Use Disorder Only, 2. Opioid Use Disorder with Co-occurring Pain Disorder, 3. Pain  
47 Disorder Only. Panellists will indicate their preference for various perioperative strategies (continue,  
48 reduce, stop) by systematically rating these indications from chapters 1 to 3.  
49

### 50 **Selection of National Panel of Experts (Participants and Recruitment)**

51 'Experts' were defined as individuals involved in the management, development, research, teaching  
52 or analysis of clinical perioperative buprenorphine strategies. Because the Delphi group size  
53 depends more on optimizing group dynamics to obtain consensus than statistical analysis, we  
54 aimed for a panel size based on original Delphi methodology from the RAND study (34) (optimal  
55 panel size of 9 and no greater than 15). We set an a priori estimate of panellist attrition rate (20%)  
56 and aimed to select up to 15 panellists for Round 1 (the maximum recommended by the RAND  
57 authors).  
58  
59  
60

1  
2  
3 To identify experts in the field of addiction and perioperative medicine, we reviewed authorship of  
4 published guidelines and case reports of buprenorphine management in the perioperative period;  
5 we identified established national and regional profiles in addiction, pain, or perioperative medicine;  
6 we solicited peer recommendations from individuals on boards of the National Canadian Pain,  
7 Addiction, and Anaesthesiology Societies (CSAM, CPS, CAS). We sought to diversify our panel by  
8 selecting panellists with practice experience in all the Canadian provinces, membership on  
9 professional societies, and wide-ranging expertise.

10 We initially reached out to these prospective expert panellists by emailing solicitation letters  
11 describing the project and the timelines involved (Appendix 2). Prospective panellists were then  
12 asked to complete and return a conflict of interest form (Appendix 3) along with their indication of  
13 interest in the project. Conflicts of Interest were reviewed by the Steering Committee and  
14 prospective panellists with potential conflicting industry affiliations were removed from the final  
15 shortlist. Possible incentives for participation in this process included (1) the opportunity to be  
16 selected into a diverse group (2) unique educational opportunities and (3) increased internal and  
17 external visibility (1).  
18

### 19 **Patient and Public Involvement**

20 We included a patient on our steering committee and expert panel in order to develop a research  
21 question and outcome measures that were informed by patient priorities, experience, and  
22 preferences. Furthermore, inclusion of a nurse practitioner also allowed the panellists to consider  
23 the values and preferences of the target population.  
24

### 25 **Ethics**

26 All participants will be informed that by responding to the questionnaire, they have indicated their  
27 consent to participate in the study and have their de-identified responses included in associated  
28 analyses. All data will be preserved on paper (under lock and key) as well as a computer (which is  
29 password protected) in a locked office, in accordance with standard guidelines. Only the steering  
30 committee will have access to the data, which will be destroyed after 5 years in accordance with  
31 local guidelines.

32 We obtained an official waiver from our institutional REB for the conduct of this protocol. The REB  
33 deemed our Delphi protocol not to be research as defined in the Tri-Council Policy Statement, and  
34 therefore, did not fall under the purview of the REB.  
35  
36  
37  
38  
39  
40  
41  
42  
43  
44  
45  
46  
47  
48  
49  
50  
51  
52  
53  
54  
55  
56  
57  
58  
59  
60

## Delphi Procedures (Data Collection and Data Analysis)

We will administer paper questionnaires that will be delivered as attachments to expert panellists by email. Panellists will be asked to print out the questionnaires and complete them on paper. The email will include an instruction form (Appendix 4) that includes a table of contents and a sample exercise grid. Furthermore, a systematic review completed by the steering committee will be provided to panellists as a resource for supplement existing knowledge and experience in this topic. To reduce the likelihood of attrition bias, we will notify the panel that authorship of the final guideline document will be offered only to participants that complete the entire Delphi process.

### Round 1 & 2 of Delphi Procedure

The Delphi process will consist of 2 survey rounds. The first round will consist of questionnaires that will be completed remotely by all panellists. Panellists will be blinded to each other's participation in the first round to prevent any communication that may lead to bias in the ratings. The first survey round will extend to 3 weeks, with the first week dedicated to addressing any concerns raised by panellists. In this round, panellists will first be asked to rate the appropriateness of continuing or stopping buprenorphine where: 1 = Very Appropriate to Stop Buprenorphine and 9 = Very Appropriate to Continue Buprenorphine at the same or reduced dose. Next, panellists will be asked to rate the appropriateness of reducing vs maintaining dosage, where: 1 = Very Appropriate to reduce Buprenorphine dosage; and 9 = Very Appropriate to Continue Buprenorphine at the same dosage. Panellists will also be asked to identify potential deletions, modifications, or points of clarification upon return of the rating forms. Furthermore, they will be urged to consider patient populations that will require individualized approaches to the management of their buprenorphine dose in the perioperative period. Panellists will then scan and return their rating forms with unique personal identifier codes on each page.

In order to identify thresholds for agreement, we will include pre-determined information about buprenorphine dose, formulation, diagnosis (Pain and/or OUD), risk of exacerbation of underlying disorder, expected surgical pain, and availability of regional anaesthetic technique in the final list of indications. These 840 indications will reflect the complete perioperative period, including strategies for communication with the outpatient provider and utilization of multimodal analgesia.

After completion of round 1, a 2-week Analysis Period will ensue, in which two blinded independent analysts will extract de identified data from rating forms and input data into two mutually exclusive databases. De-identified results including scores for each indication (including median and mode scores, interquartile ranges, indications with universal consensus, and qualitative feedback) along with a narrative report of the findings will be remitted to individual panellists to review prior to round 2 of the Delphi Process. The second-round meeting will be conducted in person and over teleconference given the geographic diversity of expert panellists. Any ambiguous indications, or external factors not previously considered will be aggregated for discussion during this round. Panellists will have the opportunity to discuss addition or removal of indications (items) at this point. If indications are deemed to be insufficient (not capturing the breadth of the theme) or overly inclusive (extreme granularity of indications) then the steering committee will offer a second round of rating after inclusion or exclusion of culprit items. If duplicate indications exist, where possible, the steering committee will aim to combine indications.

### Definition of Consensus

In any Delphi process, decision rules are determined in advance to both define and determine consensus. Consensus on a topic is usually determined if a certain number or percentage of the votes falls within a prescribed range. The Steering Committee has *a priori* decided on its definition of consensus in order to avoid bias. Using the European Union BIOMED Concerted Action on Appropriateness for surgical procedures as referenced in the RAND/UCLA Appropriateness Method User's Manual (34).

We define consensus (agreement) in 2 ways: 1) Appropriate treatment defined as a clustering of scores with a median score in the high end of the scale (7-9) without 'disagreement' (i.e. more than

1  
2  
3 2 panellists' scores in the low end of the scale, 1-3) and 2) Inappropriate treatment defined as a  
4 clustering of scores with a median score in the low end of the scale (1-3) without 'disagreement'  
5 (i.e. more than 2 panellists' scores in the high end of the scale, 7-9).  
6

### 7 **Development of Guidelines and Recommendations**

8 A final operational manual with decision rules for each indication will be presented to panellists  
9 during the second-round meeting, with accompanying explanatory documents as necessary.  
10 Panellists will be asked to rank and order the recommendations to rationalize the number of items  
11 included in the final guideline as per the EQUATOR network's reporting tool for practice guidelines  
12 in healthcare (RIGHT) (33). An email questionnaire will aim to obtain a final majority agreement on  
13 the synthesis of comments after the 2<sup>nd</sup> round of the Delphi process. It is expected that clear and  
14 concise rationale will accompany individual recommendation statements.  
15

### 16 **Review and Quality Assurance**

17 We plan to use a 2-step process in order to develop and refine an internationally agreed upon  
18 guideline for the perioperative management of patients maintained on buprenorphine. Initially, a  
19 draft guideline will undergo independent review by members external to the steering committee.  
20 Any comments will be addressed explicitly in the final guideline document. A questionnaire will be  
21 emailed out to panellists after the second round to solicit suggestions for improvement in future  
22 iterations.

23 The guideline document should reflect the needs of patients who have co-occurring disorders  
24 where possible, therefore facilitating its use in as many perioperative scenarios as possible. The  
25 final consensus guidelines will be submitted to a perioperative journal and championed by individual  
26 panellists at their home institutions.  
27

28 To test the acceptability of the proposed guidelines due to varying geography and practice patterns,  
29 we will seek annual comments and suggestions from regional and national users of the guideline.  
30 The guideline document should be reviewed annually in order to reflect shifting evidence and expert  
31 opinion.  
32

### 33 **Funding and management of interests**

34 No funding sources will be used in any stage of the guideline development. Individual steering  
35 committee members and panellists were made to complete conflict of interest forms prior to  
36 involvement in this process. Any prospective steering committee members or panellists with  
37 perceived conflicts of interests were not included at any point of the guideline development. Original  
38 declaration forms outlining conflict of interest are available upon request to the first author of the  
39 study (Akash Goel).  
40

### 41 **Limitations of the Guideline**

42 Increasingly, providers are beginning to see off-label prescription of sublingual buprenorphine for  
43 patients with pain disorders. Furthermore, there are several new formulations of buprenorphine  
44 emerging. As evidence emerges and new formulations of buprenorphine are developed, these  
45 guidelines will require updating in the future hopefully on an annual basis.  
46

### 47 **Delphi Study Status**

48 The first round of the Delphi process will begin in October, with an in-person, second round meeting  
49 scheduled in November 2018. Data collection and analysis will occur after the second-round  
50 meeting if panellists and the steering committee are satisfied that all important questions have been  
51 addressed. A paper reporting the results of the Delphi process will be submitted for publication in  
52 early 2019 followed by conference presentations. Data collection will start in October 2018 and  
53 anticipated to be completed by December 2018.  
54

### 55 **Author Statement**

56 Akash Goel, Joel Weissman and Harsha Shanthanna developed the Delphi Protocol and  
57 methodology  
58  
59  
60

1  
2  
3  
4 Akash Goel and Saam Azargive developed and modified Round 1 panel rating forms  
5

6 Akash Goel, Karim Ladha, Wiplove Lamba, Scott Duggan, John Hanlon, Tania Di Renna, Philip  
7 Peng and Hance Clarke were involved in the development of the research question and formulation  
8 of the Delphi Protocol as part of the Steering Committee  
9

### 10 **Acknowledgements**

11 We would like to acknowledge Michael Satok-Wolman (our patient advisor) in his contributions to  
12 the development of rater forms and the Delphi process.  
13

14 We would like to acknowledge Kari Van-Kamp (our allied health care representative) in her  
15 contributions as to the development of the Delphi protocol.  
16  
17  
18  
19  
20  
21  
22  
23  
24  
25  
26  
27  
28  
29  
30  
31  
32  
33  
34  
35  
36  
37  
38  
39  
40  
41  
42  
43  
44  
45  
46  
47  
48  
49  
50  
51  
52  
53  
54  
55  
56  
57  
58  
59  
60

## References

1. Anderson TA, Quaye A, Ward E, Wilens T, Hilliard P, Brummet C: To Stop or Not, That Is the Question: Acute Pain Management for the Patient on Chronic Buprenorphine. *Anesthesiology* 2017; 126(6): 1180-6
2. Potter, J.S.; Dreifuss, J.A.; Marino E.N. et al. The multisite prescription opioid addiction treatment study: 18-month outcomes. *Journal of Substance Abuse Treatment* (48)1:62-69, 2015.
3. Weiss, R.D.; Potter, J.S.; Griffin, M.L. et al. Long-term outcomes from the National Drug Abuse Treatment Clinical Trials Network Prescription Opioid Addiction Treatment
4. Saloner B, Levin J, Chang H, Jones C, Alexander GC. Changes in Buprenorphine-Naloxone and Opioid Pain Reliever Prescriptions After the Affordable Care Act Medicaid Expansion. *JAMA Network Open*. 2018;1(4):e181588. doi:10.1001/jamanetworkopen.2018.1588
5. Ward N, Quaye AN, Wilens T: Opioid Use Disorders: Perioperative Management of a Special Population. *Anesth Analg*. 2018; 127(2):539-547
6. Adams E, Sharifi N, Lappalainen L: A Guideline for the clinical management of opioid use disorder; British Columbia Centre on Substance Use; 18-19. Available from at: <http://www.bccsu.ca/care-guidance-publications> - Last Accessed December 4, 2017
7. Cornish R, Macleod J, Strang J, Vickerman P, Hickman M: Risk of death during and after opiate substitution treatment in primary care: prospective observational study in UK General Practice Research Database; *BMJ* 2010; 341:c5475
8. Huang A, Katznelson R, de Perrot M, Clarke H: Perioperative Management of a patient undergoing Clagett window closure stabilized on Suboxone for chronic pain: a case report. *Can J Anesthesia* 2014; 61: 826-31
9. Book S, Myrick H, Malcolm R: Buprenorphine for postoperative pain following general surgery in a buprenorphine-maintained patient. *Am J Psychiatry* 2007; 164(6): 979
10. Silva J, Rubinstein A: Continuous Perioperative Sublingual Buprenorphine. *Journal of Pain and Palliative Care Pharmacology* 2016; 30(4): 289-93
11. Chern S, Isserman R, Chen L, Ashburn M, Liu R: Perioperative Pain Management for Patients on Chronic Buprenorphine: A Case Report. *J Anesth Clin Res* 2013; 3(250)
12. Israel J, Poore S: The clinical conundrum of perioperative pain management in patients with opioid dependence: lessons from two cases. *Plast Reconstr Surg* 2013; 131(4): 657
13. Jones, H, Johnson R, Milio L: Post-cesarean pain management of patients maintained on methadone or buprenorphine. *Am J Addict* 2006; 15(3): 258-9
14. Marcucci C, Fudin J, Thomas P, Sandson N, Welsh C: A new pattern of buprenorphine misuse may complicate perioperative pain control. *Anesth Analg* 2009; 108(6): 1996-7
15. Khelemsky Y, Schauer J, Loo N: Effect of buprenorphine on total intravenous anesthetic requirements during spine surgery. *Pain Physician* 2015; 18:261-4
16. McCormick Z, Chu S, Chang-Chien G, Joseph P: Acute pain control challenges with buprenorphine/naloxone therapy in a patient with compartment syndrome secondary to McArdle's Disease: A case report and review. *Pain Physician* 2013; 14: 1187-91



17. Rodgman C, Pletsch, G: Double successful buprenorphine/naloxone induction to facilitate cardiac transplantation in an iatrogenically opiate-dependent patient. *Journal of Addiction Medicine* 2012; 6(2): 177-8
18. Kornfeld H, Manfredi L: Effectiveness of full agonist opioids in patients stabilized on buprenorphine undergoing major surgery: A case series. *American Journal of Therapeutics* 2010; 17: 523-28
19. Hassamal S, Goldenberg M, Ishak W, Haglund M, Miotto K, Danovitch I. Overcoming barriers to initiating medication-assisted treatment for heroin use disorder in a general medical hospital: A case report and narrative literature review. *Journal of Psychiatric Practice* 2017; 23(3): 221-9
20. Brummett C, Trivedi K, Dubovoy A, Berland D: Dexmedetomidine as a novel therapeutic for postoperative pain in a patient treated with buprenorphine. *Journal of Opioid management* 2009; 5(3): 175-9
21. Gupta D, Christensen C, Soskin V: Marked variability in peri-partum anesthetic management of patients on buprenorphine maintenance therapy (BMT): Can there be an underlying acute opioid induced hyperalgesia precipitated by neuraxial opioids in BMT patients? *Middle East J Anaesthesiology* 2013; 22(3): 273-81
22. Macintyre P, Russel R, Usher K, Gaughwin M, Huxtable C: Pain relief and opioid requirements in the first 24 hours after surgery in patients taking buprenorphine and methadone opioid substitution therapy. *Anaesth Intensive Care* 2013; 41:222-30
23. Meyer M, Paranya G, Norris A, & Howard D: Intrapartum and postpartum analgesia for women maintained on buprenorphine during pregnancy. *European Journal of Pain* 2010; 14(9): 939-43
24. Hansen L, Stone G, Matson C, Tybor D, Pevear M, Smith E: Total Joint Arthroplasty in Patients Taking Methadone or Buprenorphine/Naloxone Preoperatively for Prior Heroin Addiction: A Prospective Matched Cohort Study. *J Arthroplasty* 2016; 31(8):1698-701.
25. Hoflich A, Langer M, Jagsch R, Bawert A, Winklbaur B, Fischer G, Unger A: Peripartum pain management in opioid dependent women. *Eur J Pain* 2012; 16(4):574-84
26. Childers JW, Arnold RM. Treatment of pain in patients taking buprenorphine for opioid addiction #221. *J Palliat Med* 2012; 15:613-614
27. Bryson EO. The perioperative management of patients maintained on medications used to manage opioid addiction. *Curr Opin Anaesthesiol* 2014; 27:359-364
28. Berry P, Besio S, Brooklyn J, Cimaglio B, Clark R, Davis W, et al.: Vermont Practice Guidelines 2015; Vermont Department of health; division of alcohol and drug abuse programs; office of Vermont health access; 1-30. Available from: [http://contentmanager.med.uvm.edu/docs/default-source/vchip-documents/vchip\\_2buprenorphine\\_guidelines.pdf?sfvrsn=2](http://contentmanager.med.uvm.edu/docs/default-source/vchip-documents/vchip_2buprenorphine_guidelines.pdf?sfvrsn=2) (accessed September, 2018).
29. Sen S, Arulkumar S, Cornett E, Gayle J, Flower R, Fox C, Kaye A: New Pain Management Options for the Surgical patient on Methadone and Buprenorphine. *Curr Pain Headache Rep* 2016; 20:16
30. Brummet C. Management of sublingual buprenorphine in the acute postoperative setting. The University of Michigan Health System 2008. Available from: [http://anes.med.umich.edu/vault/1003149Buprenorphine\\_suboxone\\_subutex\\_perioperative](http://anes.med.umich.edu/vault/1003149Buprenorphine_suboxone_subutex_perioperative)

1  
2  
3 [management.pdf](#). (Accessed August 2015)  
4

- 5 31. Jonan AB, Kaye AD, Urman RD. Buprenorphine Formulations: Clinical Best Practice Strategies  
6 Recommendations for Perioperative Management of Patients Undergoing Surgical or  
7 Interventional Pain Procedures. *Pain Physician* 2018; 21:E1-E12
- 8  
9 32. Lembke A, Ottestad E, Schmiesing C. Patients Maintained on Buprenorphine for Opioid Use  
10 Disorder Should Continue Buprenorphine Through the Perioperative Period. *Pain Medicine*.  
11 2019 Mar 1;20(3):425-428. doi: 10.1093/pm/pny019
- 12 33. Chen Y, Yang K, Marusic Q, Qaseem A, Meerpohl JJ, Flottorp S, Aki EA, Schunemann HJ,  
13 Chan ESY, Falck-Ytter Y, Ahmed F, Barber S, Chen C, Zhang M, Xu B, Tian J, Song F, Shang  
14 H, Tang K, Wang Q, Norris SL. A reporting Tool for the practice guidelines in healthcare: The  
15 RIGHT statement. *Ann Internal Med*. 2017;166(2): 128-132
- 16  
17 34. Fitch, K., Bernstein, S. J., Aguilar, M. D., Burnand, B., LaCalle, J. R., Lázaro, P., . . . Kahan, J.  
18 P. (2001). (). The RAND/UCLA Appropriateness Method User's Manual Santa Monica, CA:  
19 Rand Health.
- 20  
21 35. Slade SC, Dionne CE, Underwood M, *et al*. Standardised method for reporting exercise  
22 programmes: protocol for a modified Delphi study *BMJ*  
23 *Open* 2014;4:e006682. doi: 10.1136/bmjopen-2014-006682
- 24  
25 36. Okoli C, Pawlowski SD. The Delphi method as a research tool: an example, design  
26 considerations and applications. *Inform Manag* 2004;42:15-29. doi:10.1016/j.im.2003.11.002
- 27  
28 37. Goel A, Azargive S, Hanlon J, Ladha K, *et al*/The Perioperative Patient on Buprenorphine: A  
29 Systematic Review of perioperative management strategies and patient outcomes. *Canadian*  
30 *Journal of Anesthesia* 2019 Feb;66(2):201-217. doi: 10.1007/s12630-018-1255-3
- 31  
32  
33  
34  
35  
36  
37  
38  
39  
40  
41  
42  
43  
44  
45  
46  
47  
48  
49  
50  
51  
52  
53  
54  
55  
56  
57  
58  
59  
60

| Title                      | Date | Major Peri-operative recommendations                                                                                                                                                                                                                                                                                                                                                                                                                                                                                                                                                                                                                                                                                                                                                                                                                              |
|----------------------------|------|-------------------------------------------------------------------------------------------------------------------------------------------------------------------------------------------------------------------------------------------------------------------------------------------------------------------------------------------------------------------------------------------------------------------------------------------------------------------------------------------------------------------------------------------------------------------------------------------------------------------------------------------------------------------------------------------------------------------------------------------------------------------------------------------------------------------------------------------------------------------|
| Anderson et al             | 2017 | <ol style="list-style-type: none"> <li>1. Where moderate to severe pain is expected, cancel surgery such that buprenorphine is weaned off before surgery and short-acting opioids are used to replace it.</li> <li>2. A plan for follow-up and reinstatement of therapy should be established</li> <li>3. Anticipate patient's opioids requirements will be similar to an opioid-tolerant patient</li> <li>4. Consider adjuncts – NSAIDs, membrane stabilizers, acetaminophen, local anaesthetics, regional anesthetic techniques</li> <li>5. Ensure appropriate outpatient follow-up with buprenorphine provider</li> </ol>                                                                                                                                                                                                                                      |
| Sen et al                  | 2016 | <ol style="list-style-type: none"> <li>1. Discontinue buprenorphine 72H before operative procedure, or replace buprenorphine with methadone</li> <li>2. Expect additional opioid doses for acute pain control</li> <li>3. Discharge on pure opioid induction protocol of buprenorphine in conjunction with primary provider</li> </ol>                                                                                                                                                                                                                                                                                                                                                                                                                                                                                                                            |
| Jonan et al                | 2018 | <ol style="list-style-type: none"> <li>1. Utilize non-opioid adjuncts, regional Anesthesia, and local anesthetic infiltration by surgeon where possible.</li> <li>2. Where low post operative pain is expected, continue buprenorphine perioperatively without taper</li> <li>3. Where intermediate pain is expected, discontinue buprenorphine 3 days prior to procedure, consider high dose PCA, and consider ICU admission for respiratory monitoring</li> <li>4. Where High pain is expected, discontinue buprenorphine 3-5 days prior to procedure, consider pure opioid agonist to manage withdrawal, and consider ICU for respiratory monitoring</li> </ol>                                                                                                                                                                                                |
| Childers and Arnold        | 2012 | <ol style="list-style-type: none"> <li>1. Adjuvant analgesics and interventional procedures should be provided if available</li> <li>2. Hold buprenorphine and start short acting opioid agonists if expecting moderate to severe pain</li> <li>3. Re-initiate buprenorphine in the post-operative period with the buprenorphine provider</li> <li>4. Where mild to moderate pain is expected, consider treating pain with buprenorphine alone, or use short-acting opioid agonists at higher doses</li> <li>5. Consider replacing buprenorphine with methadone for opioid addiction where ongoing pain management is expected</li> </ol>                                                                                                                                                                                                                         |
| Bryson                     | 2014 | <ol style="list-style-type: none"> <li>1. Ideally, buprenorphine should be discontinued 72H before surgery, then restarted once patient no longer has acute pain requiring narcotic analgesics</li> <li>2. If the plan is to continue buprenorphine, use short-acting opioid analgesics to achieve pain control, expecting higher than normal effective doses. Divide buprenorphine maintenance dose and administer every 6-8 hours</li> <li>3. If the plan is to stop the buprenorphine, use standard opioids for analgesia, conduct a slow taper over 2 weeks or an abrupt taper over 3 days, remaining buprenorphine free for 72 hours before surgery</li> <li>4. If the relapse rate is too high, replace maintenance dose of buprenorphine with methadone before surgery, and use another short-acting opioid and analgesic for breakthrough pain</li> </ol> |
| Berry (Vermont Guidelines) | 2015 | <ol style="list-style-type: none"> <li>1. Reduce buprenorphine dose to 8mg SL on the day of surgery</li> <li>2. Use oxycodone or other full agonists to make up opiate debt + typical post operative course management</li> <li>3. Expect longer than normal pain management regimen in the post operative period</li> <li>4. Buprenorphine doses above 10mg daily will block opioid analgesics for pain</li> </ol>                                                                                                                                                                                                                                                                                                                                                                                                                                               |
| Lembke et al. (Editorial)  | 2018 | <ol style="list-style-type: none"> <li>1. Continue buprenorphine in the perioperative period for patients taking 12mg SL or less</li> <li>2. Taper buprenorphine to 12 mg SL 2-3 days pre-op</li> <li>3. Multimodal analgesia, Regional techniques where possible</li> <li>4. Higher than normal doses of opioids to treat pain for 2-4 days post-op</li> </ol>                                                                                                                                                                                                                                                                                                                                                                                                                                                                                                   |

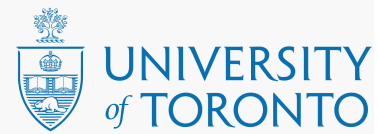

Dear Prospective Panelist,

We are writing to you to because you have been nominated for a special expert consensus panel. This Panel will be establishing guidelines on the perioperative management of patients who are taking buprenorphine for the management of pain and/or substance use disorder.

We will be embarking on this project because current evidence provides little guidance as to how best to manage this group of patients. Our group has conducted a systematic review of the existing evidence and we hope to use this for the basis of conducting a 2-staged Delphi process resulting in consensus on appropriateness of continuing or stopping buprenorphine in the perioperative period.

This process involves the following steps and timeline:

| Task                                                                                                                                     | Timeline                      |
|------------------------------------------------------------------------------------------------------------------------------------------|-------------------------------|
| Review of existing literature (Complete)                                                                                                 | Complete                      |
| <b>Nomination of experts in Addiction medicine, pain medicine, and Anesthesiology</b><br>Obtain CVs, Conflict of Interest Forms (Delphi) | By September                  |
| <b>Confirmation of Panel by Core Committee</b><br><b>Dissemination of Core Materials to Expert Panel</b>                                 | By September 15               |
| Review of evidence by expert panel (remotely done)                                                                                       | By September 31 <sup>st</sup> |
| Review of consensus statements (remotely done)                                                                                           | By September 31 <sup>st</sup> |
| Submission of consensus statements, and collation of data                                                                                | By September 31 <sup>st</sup> |
| Meeting by Teleconference/In-person to review consensus and/or conflicts                                                                 | By October 31st               |
| Development of consensus                                                                                                                 | By December 30th              |
| Publication of consensus document                                                                                                        | By January 2019               |

As part of the nomination process, we are seeking recognized experts as part of the Canadian Society of Addiction Medicine (CSAM), CPS (Canadian Pain Society) and CAS (Canadian Anesthesiologists' Society). You were nominated based on the following 4 criteria:

|                                  |
|----------------------------------|
| Leadership in the specialty      |
| Absence of conflicts of interest |
| Geographic diversity             |
| Diversity of practice setting    |

We would be delighted to have you serve on this panel, and would be happy to answer any questions you may have about the process. Please return your CVs and COI forms to me by August 4 if you are interested in pursuing this opportunity.

Sincerely,

The Steering Committee

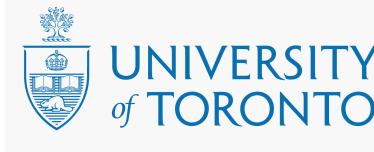

# Clinical Practice Advisory for Perioperative Management of Buprenorphine

## CONFLICT OF INTEREST DISCLOSURE FORM

**The following are examples of conflicts of interest:**

- Any direct financial interest in a for-profit entity such as a pharmaceutical organization, medical devices company, communications firm, or other financial supporter
- Current or recent participation in a clinical trial sponsored by the Organization
- Membership with a speakers bureau
- Holding of a patent for a product referred to in the CPD activity or marketed by a commercial organization
- Receiving honoraria to speak on behalf of a pharmaceutical organization or medical communication company, including talks for which the individual has been contracted but has not yet received payment for
- Financial relationships with program-sponsoring organizations that are non-pharmaceutical or non-health care organizations (eg, insurance companies, financial institutions, government, for-profit organizations, other non-profit organizations)

I, Hance Clarke MD PhD declare no conflict of interest

I, \_\_\_\_\_ declare the following conflicts of interest  
(Please list below)

Signature  -

Name Hance Clarke

Title Director Pain Services / TGH

**PERIOPEARTIVE BUPRENORPHINE MANAGEMENT – PRIVATE AND CONFIDENTIAL – PLEASE DO NOT SHARE**Perioperative Management of Buprenorphine Products**Panel Instructions**

Dear Panellist,

Thank you for your participation in the national guideline development for managing patients taking buprenorphine products in the perioperative period. Below you will find some definitions and instructions for how to fill out the panel rating forms.

There are 840 indications that you will be required to rate.

**How does the Modified Delphi process work?**

There are 2 rounds of ratings – the first round is done in a ‘blinded’ fashion where panellists are not aware of who the other panellists are, and are not meant to discuss their thoughts with each other. They are to fill out rater forms and return them to the **moderator**. There will be a second round where panellists will meet in person and teleconference to discuss discrepancies in their rating and aim to obtain consensus on conflicting areas.

**How are the rating forms organized?**

There are 3 **chapters** that are focused on the diagnosis of the patient prior to surgery

1. *OPIOID USE DISORDER ONLY (No co-occurring pain disorder) – 280 indications*
2. *OPIOID USE DISORDER AND PAIN DISORDER – 280 indications*
3. *PAIN DISORDER ONLY (No co-occurring opioid use disorder) – 280 indications*

These chapters are then divided into various **sections** that are organized by stage of the patient experience:

1. *PRE-OP PLANNING – Buprenorphine Strategies*
2. *POST-OP PAIN – Buprenorphine in patients experiencing post op pain*
3. *POST-OP PAIN – Analgesic adjuncts to manage pain (i.e. NSAIDS, Tylenol etc)*
4. *POST-OP PAIN – Opioids to manage pain (i.e. fentanyl, hydromorphone)*
5. *DISCHARGE – Discharge strategies*
6. *OUTPATIENT PROVIDER INVOLVEMENT – indications for involving outpatient provider in these settings*

**PERIOPEARTIVE BUPRENORPHINE MANAGEMENT – PRIVATE AND CONFIDENTIAL – PLEASE DO NOT SHARE****What is the definition of ‘Appropriateness’?**

The RAND/UCLA appropriateness method (which we are using in this guideline development process) allows panellists to rate appropriateness of therapy from 1-9. Median scores of all panellists will be obtained, and consensus definitions will be provided during the second round (in person/teleconference meeting of panel)

**Instructions on how to use the Rater forms:**

- 1) **Print out the forms**
- 2) **Read the Chapter on the top of the page** – I.e. Chapter 1, Section 1.1 reads: “Opioid Use Disorder Only (No Concurrent Pain Disorder)” – this indicates to the panellist to consider patients with opioid use disorder ONLY and no concurrent pain disorder when rating an indication
- 3) **Read across the top of the table** - You will see two big categories, patients who are at LOW risk of ‘Chapter 1’ Disorder Exacerbation and HIGH risk of Chapter 1 Disorder Exacerbation. This directs panellists to stratify patients based on the definitions provided to them and their own experience.
- 4) **Read down the left most column of the table** – The left most column labels the Section within the chapter – “pre-operative planning”. As the panellist scrolls down the left-most column, they will notice that it is divided based on certain clinical characteristics – for example, what dose of buprenorphine the patient is on, how much post-operative pain is expected, and whether a regional anesthesia technique (i.e. nerve block, epidural) is feasible for the surgery for a variety of plausible scenarios.
- 5) **Read Across the INDICATION ROW** –  
Indications are dichotomized. This row indicates the options available to the panellist when rating from 1-9. For example, the first appropriateness rating available to the panellist is Appropriateness of Continuing Buprenorphine with the numbers 1 to 9 below them. This directs the panellist to choose a score for the indication, with a score of ‘9’ being closest to – ‘It is most appropriate to Continue Buprenorphine’, and a score of ‘1’ being closest to ‘It is most appropriate to stop Buprenorphine’. Any scores in between indicates a lack of certainty around the indication.

Panelists are urged to use the extremes of the rating scale.

- 6) **Use a black pen** only to **circle** the most appropriate score for the indication.
- 7) **Scan and Email** your forms to [agoel@hsph.harvard.edu](mailto:agoel@hsph.harvard.edu)

**PERIOPEARTIVE BUPRENORPHINE MANAGEMENT – PRIVATE AND CONFIDENTIAL – PLEASE DO NOT SHARE**

**Example – Refer to the colour coding to clarify – this form can only be viewed online or if printed in colour**

**Example**

CHAPTER 1: OPIOID USE DISORDER ONLY (NO CO-OCCURRING PAIN DISORDER) \_\_\_\_\_ PANELIST # \_\_\_\_\_ ROUND 1 \_\_\_\_\_

Page 1

Definitions: High Risk of Exacerbation includes concurrent mood disorder, duration of therapy <1 year, positive urine drug screen within 1 year

**Chapter 1: Opioid Use Disorder (OUD)**

**Section 1.1: Pre-Op Planning**

| INDICATION ROW                                       | LOW-MODERATE Risk of Exacerbation                                  |                                                                     | HIGH Risk of Exacerbation                                             |                                                                      | (Indication Number) |
|------------------------------------------------------|--------------------------------------------------------------------|---------------------------------------------------------------------|-----------------------------------------------------------------------|----------------------------------------------------------------------|---------------------|
|                                                      | Appropriateness of: Continue Buprenorphine Therapy (9) vs Stop (1) | Appropriateness of Maintain (1) vs. Reducing Buprenorphine (9) Dose | Appropriateness of: Continuing Buprenorphine Therapy (9) vs. Stop (1) | Appropriateness of: Maintain (1) vs. Reducing Buprenorphine Dose (9) |                     |
| A. Patient is on <b>0-8mg SL Buprenorphine Daily</b> | ----->                                                             | ----->                                                              | <-----                                                                | <-----                                                               | Leave Blank         |
| Severe Post Op Pain expected in an elective case     |                                                                    |                                                                     |                                                                       |                                                                      |                     |
| a) <b>With Regional Anesthesia</b>                   | 1 2 3 4 5 6 7 8 9                                                  | 1 2 3 4 5 6 7 8 9                                                   | 1 2 3 4 5 6 7 8 9                                                     | 1 2 3 4 5 6 7 8 9                                                    | 1-4                 |
| b) <b>WithOUT Regional Anesthesia</b>                | 1 2 3 4 5 6 7 8 9                                                  | 1 2 3 4 5 6 7 8 9                                                   | 1 2 3 4 5 6 7 8 9                                                     | 1 2 3 4 5 6 7 8 9                                                    | 5-8                 |

*For a score of 9 on this indication, refer to colour coded elements of the rater box (above) and the composite outcome (below)*

|                                                                                                                                                                                                                                                                                                                                                                                                             |
|-------------------------------------------------------------------------------------------------------------------------------------------------------------------------------------------------------------------------------------------------------------------------------------------------------------------------------------------------------------------------------------------------------------|
| <i>For patients who meet the following criteria:</i>                                                                                                                                                                                                                                                                                                                                                        |
| <ul style="list-style-type: none"> <li>1) Opioid Use Disorder and No concurrent Pain Disorder</li> <li>2) Low-Moderate Risk of Relapse of underlying disorder</li> <li>3) Taking 0-8 mg of SL buprenorphine daily</li> <li>4) Presenting for surgery where regional anesthesia technique is possible</li> <li>5) Given surgical/patient factors, likely to experience severe post-operative pain</li> </ul> |
| <i>I believe that it is most appropriate to continue buprenorphine (Score 9 out of 9) at the pre-operative dose (No reduction) (Score 1 out of 9)</i>                                                                                                                                                                                                                                                       |

**Definition of ‘Risk of Exacerbation’:** Please see definitions under specific chapters headings in the panel rating forms
