# Supplementary material for: Perioperative Pain and Addiction Interdisciplinary Network (PAIN): protocol of a practice advisory for the perioperative management of buprenorphine using a modified Delphi process
Source: PubMed Central journal article supplement — BMJ Open. 2019 May 22;9(5):e027374. doi: 10.1136/bmjopen-2018-027374 (PMC6538090; doi:10.1136/bmjopen-2018-027374), 2019-05-22
Supplement: bmjopen-2018-027374supp001.pdf [file bmjopen-2018-027374supp001.pdf]

| <b>Title</b>               | <b>Date</b> | <b>Major Peri-operative recommendations</b>                                                                                                                                                                                                                                                                                                                                                                                                                                                                                                                                                                                                                                                                                                                                                                                                                       |
|----------------------------|-------------|-------------------------------------------------------------------------------------------------------------------------------------------------------------------------------------------------------------------------------------------------------------------------------------------------------------------------------------------------------------------------------------------------------------------------------------------------------------------------------------------------------------------------------------------------------------------------------------------------------------------------------------------------------------------------------------------------------------------------------------------------------------------------------------------------------------------------------------------------------------------|
| Anderson et al             | 2017        | <ol style="list-style-type: none"> <li>1. Where moderate to severe pain is expected, cancel surgery such that buprenorphine is weaned off before surgery and short-acting opioids are used to replace it.</li> <li>2. A plan for follow-up and reinstitution of therapy should be established</li> <li>3. Anticipate patient's opioids requirements will be similar to an opioid-tolerant patient</li> <li>4. Consider adjuncts – NSAIDs, membrane stabilizers, acetaminophen, local anaesthetics, regional anesthetic techniques</li> <li>5. Ensure appropriate outpatient follow-up with buprenorphine provider</li> </ol>                                                                                                                                                                                                                                      |
| Sen et al                  | 2016        | <ol style="list-style-type: none"> <li>1. Discontinue buprenorphine 72H before operative procedure, or replace buprenorphine with methadone</li> <li>2. Expect additional opioid doses for acute pain control</li> <li>3. Discharge on pure opioid induction protocol of buprenorphine in conjunction with primary provider</li> </ol>                                                                                                                                                                                                                                                                                                                                                                                                                                                                                                                            |
| Jonan et al                | 2018        | <ol style="list-style-type: none"> <li>1. Utilize non-opioid adjuncts, regional Anesthesia, and local anesthetic infiltration by surgeon where possible.</li> <li>2. Where low post operative pain is expected, continue buprenorphine perioperatively without taper</li> <li>3. Where intermediate pain is expected, discontinue buprenorphine 3 days prior to procedure, consider high dose PCA, and consider ICU admission for respiratory monitoring</li> <li>4. Where High pain is expected, discontinue buprenorphine 3-5 days prior to procedure, consider pure opioid agonist to manage withdrawal, and consider ICU for respiratory monitoring</li> </ol>                                                                                                                                                                                                |
| Childers and Arnold        | 2012        | <ol style="list-style-type: none"> <li>1. Adjuvant analgesics and interventional procedures should be provided if available</li> <li>2. Hold buprenorphine and start short acting opioid agonists if expecting moderate to severe pain</li> <li>3. Re-initiate buprenorphine in the post-operative period with the buprenorphine provider</li> <li>4. Where mild to moderate pain is expected, consider treating pain with buprenorphine alone, or use short-acting opioid agonists at higher doses</li> <li>5. Consider replacing buprenorphine with methadone for opioid addiction where ongoing pain management is expected</li> </ol>                                                                                                                                                                                                                         |
| Bryson                     | 2014        | <ol style="list-style-type: none"> <li>1. Ideally, buprenorphine should be discontinued 72H before surgery, then restarted once patient no longer has acute pain requiring narcotic analgesics</li> <li>2. If the plan is to continue buprenorphine, use short-acting opioid analgesics to achieve pain control, expecting higher than normal effective doses. Divide buprenorphine maintenance dose and administer every 6-8 hours</li> <li>3. If the plan is to stop the buprenorphine, use standard opioids for analgesia, conduct a slow taper over 2 weeks or an abrupt taper over 3 days, remaining buprenorphine free for 72 hours before surgery</li> <li>4. If the relapse rate is too high, replace maintenance dose of buprenorphine with methadone before surgery, and use another short-acting opioid and analgesic for breakthrough pain</li> </ol> |
| Berry (Vermont Guidelines) | 2015        | <ol style="list-style-type: none"> <li>1. Reduce buprenorphine dose to 8mg SL on the day of surgery</li> <li>2. Use oxycodone or other full agonists to make up opiate debt + typical post operative course management</li> <li>3. Expect longer than normal pain management regimen in the post operative period</li> <li>4. Buprenorphine doses above 10mg daily will block opioid analgesics for pain</li> </ol>                                                                                                                                                                                                                                                                                                                                                                                                                                               |
| Lembke et al. (Editorial)  | 2018        | <ol style="list-style-type: none"> <li>1. Continue buprenorphine in the perioperative period for patients taking 12mg SL or less</li> <li>2. Taper buprenorphine to 12 mg SL 2-3 days pre-op</li> <li>3. Multimodal analgesia, Regional techniques where possible</li> <li>4. Higher than normal doses of opioids to treat pain for 2-4 days post-op</li> </ol>                                                                                                                                                                                                                                                                                                                                                                                                                                                                                                   |
