# Supplementary material for: Perioperative Pain and Addiction Interdisciplinary Network (PAIN): protocol of a practice advisory for the perioperative management of buprenorphine using a modified Delphi process
Source: PubMed Central journal article supplement — BMJ Open. 2019 May 22;9(5):e027374. doi: 10.1136/bmjopen-2018-027374 (PMC6538090; doi:10.1136/bmjopen-2018-027374), 2019-05-22
Supplement: bmjopen-2018-027374supp002.pdf [file bmjopen-2018-027374supp002.pdf]

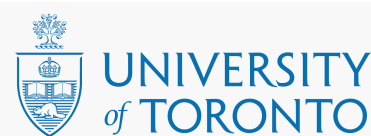

Dear Prospective Panelist,

We are writing to you to because you have been nominated for a special expert consensus panel. This Panel will be establishing guidelines on the perioperative management of patients who are taking buprenorphine for the management of pain and/or substance use disorder.

We will be embarking on this project because current evidence provides little guidance as to how best to manage this group of patients. Our group has conducted a systematic review of the existing evidence and we hope to use this for the basis of conducting a 2-staged Delphi process resulting in consensus on appropriateness of continuing or stopping buprenorphine in the perioperative period.

This process involves the following steps and timeline:

| Task                                                                                                                                     | Timeline                      |
|------------------------------------------------------------------------------------------------------------------------------------------|-------------------------------|
| Review of existing literature (Complete)                                                                                                 | Complete                      |
| <b>Nomination of experts in Addiction medicine, pain medicine, and Anesthesiology</b><br>Obtain CVs, Conflict of Interest Forms (Delphi) | By September                  |
| <b>Confirmation of Panel by Core Committee</b><br><b>Dissemination of Core Materials to Expert Panel</b>                                 | By September 15               |
| Review of evidence by expert panel (remotely done)                                                                                       | By September 31 <sup>st</sup> |
| Review of consensus statements (remotely done)                                                                                           | By September 31 <sup>st</sup> |
| Submission of consensus statements, and collation of data                                                                                | By September 31 <sup>st</sup> |
| Meeting by Teleconference/In-person to review consensus and/or conflicts                                                                 | By October 31st               |
| Development of consensus                                                                                                                 | By December 30th              |
| Publication of consensus document                                                                                                        | By January 2019               |

As part of the nomination process, we are seeking recognized experts as part of the Canadian Society of Addiction Medicine (CSAM), CPS (Canadian Pain Society) and CAS (Canadian Anesthesiologists' Society). You were nominated based on the following 4 criteria:

|                                  |
|----------------------------------|
| Leadership in the specialty      |
| Absence of conflicts of interest |
| Geographic diversity             |
| Diversity of practice setting    |

We would be delighted to have you serve on this panel, and would be happy to answer any questions you may have about the process. Please return your CVs and COI forms to me by August 4 if you are interested in pursuing this opportunity.

Sincerely,

The Steering Committee
