# Supplementary material for: Perioperative Pain and Addiction Interdisciplinary Network (PAIN): protocol of a practice advisory for the perioperative management of buprenorphine using a modified Delphi process
Source: PubMed Central journal article supplement — BMJ Open. 2019 May 22;9(5):e027374. doi: 10.1136/bmjopen-2018-027374 (PMC6538090; doi:10.1136/bmjopen-2018-027374), 2019-05-22
Supplement: bmjopen-2018-027374supp003.pdf [file bmjopen-2018-027374supp003.pdf]

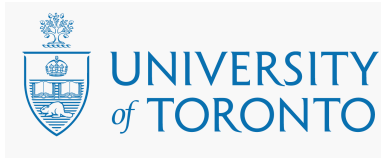

# Clinical Practice Advisory for Perioperative Management of Buprenorphine

## CONFLICT OF INTEREST DISCLOSURE FORM

The following are examples of conflicts of interest:

- Any direct financial interest in a for-profit entity such as a pharmaceutical organization, medical devices company, communications firm, or other financial supporter
- Current or recent participation in a clinical trial sponsored by the Organization
- Membership with a speakers bureau
- Holding of a patent for a product referred to in the CPD activity or marketed by a commercial organization
- Receiving honoraria to speak on behalf of a pharmaceutical organization or medical communication company, including talks for which the individual has been contracted but has not yet received payment for
- Financial relationships with program-sponsoring organizations that are non-pharmaceutical or non-health care organizations (eg, insurance companies, financial institutions, government, for-profit organizations, other non-profit organizations)

I, Hance Clarke MD PhD declare no conflict of interest

I, \_\_\_\_\_ declare the following conflicts of interest  
(Please list below)

Signature  -

Name Hance Clarke

Title Director Pain Services / TGH
